# Supplementary material
Source: PubMed Central journal article supplement (PMC3051241)
Supplement: tpc.109.072231_1.pdf [file tpc.109.072231_1.pdf]

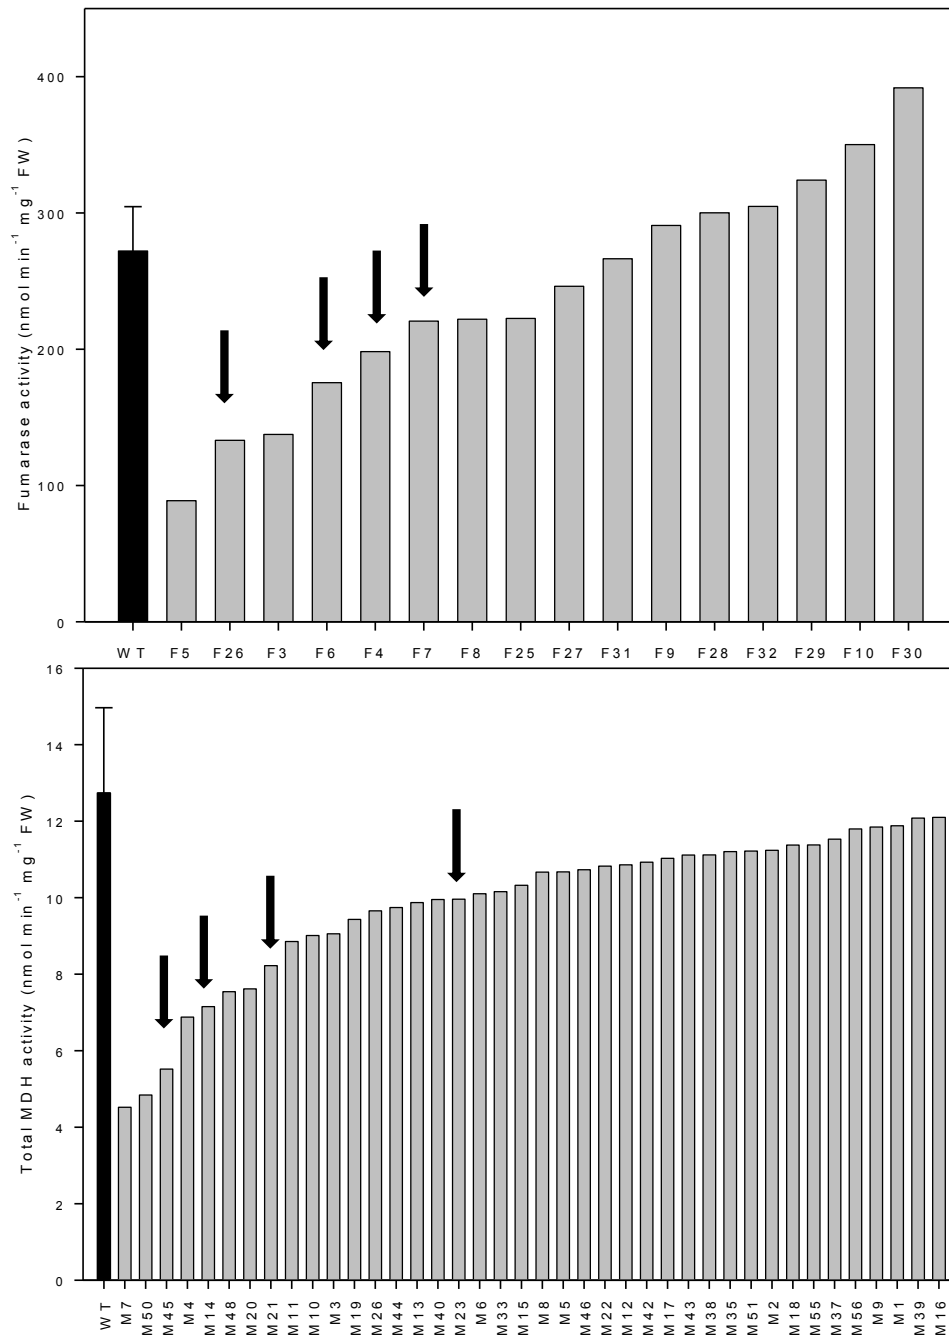

**Supplemental Figure 1.** Screening of total fumarase and malate dehydrogenase activity in primary fumarase (A) and malate dehydrogenase (B) transformants in extract of tissue sampled from green fruits 35 days after flowering. Black narrows indicate the selected lines for further analysis.

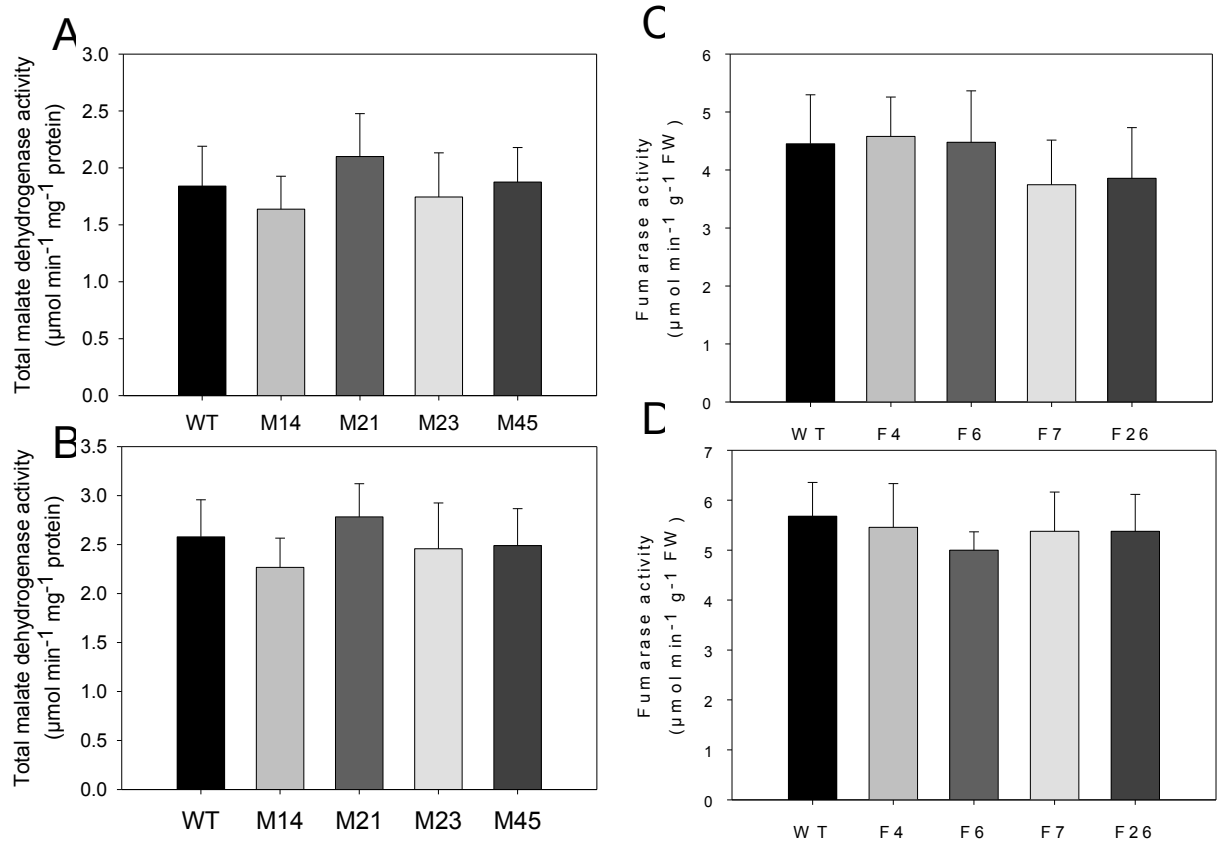

**Supplemental Figure 2.** Total malate dehydrogenase activity determined in 6-week-old leaves (A) in 2-week-old leaves (B) in malate dehydrogenase lines and fumarase activity in 6-week-old leaves (C) in 2-week-old leaves in fumarase lines (D). Values presented are the means  $\pm$  SE of five biological replicates. An asterisk indicates the values that were determined by the *t*-test to be significantly different ( $P < 0.05$ ) from the wild type.

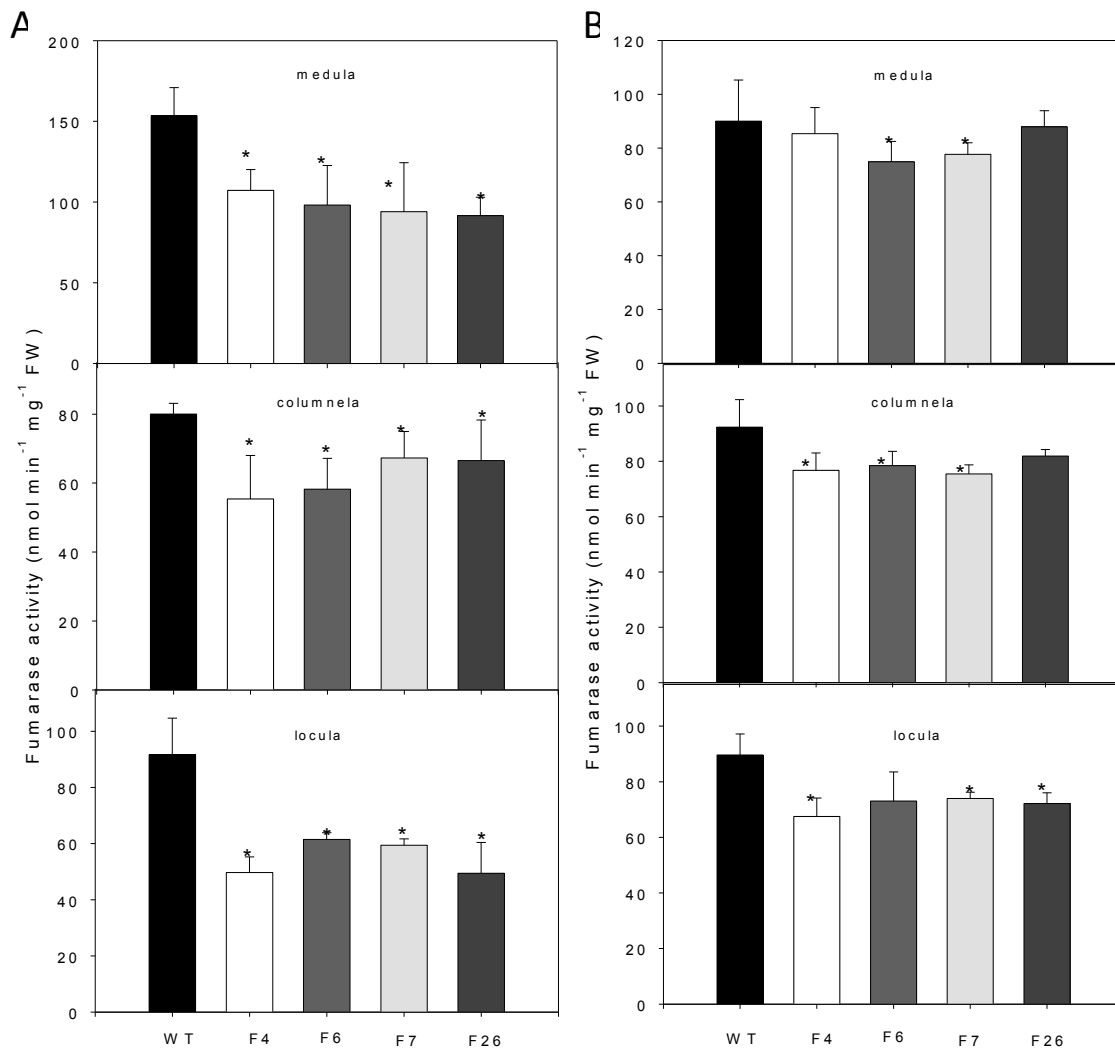

**Supplemental Figure 3.** Total fumarase activity in fumarase lines in different fruit tissues. The measurements were performed in green fruits with 35 days after flowering (A) and 65 days after flowering (B). The values are presented as the mean  $\pm$  SE of ten biological replicates. An asterisk indicates the values that were determined by the *t*-test to be significantly different ( $P < 0.05$ ) from the wild type.

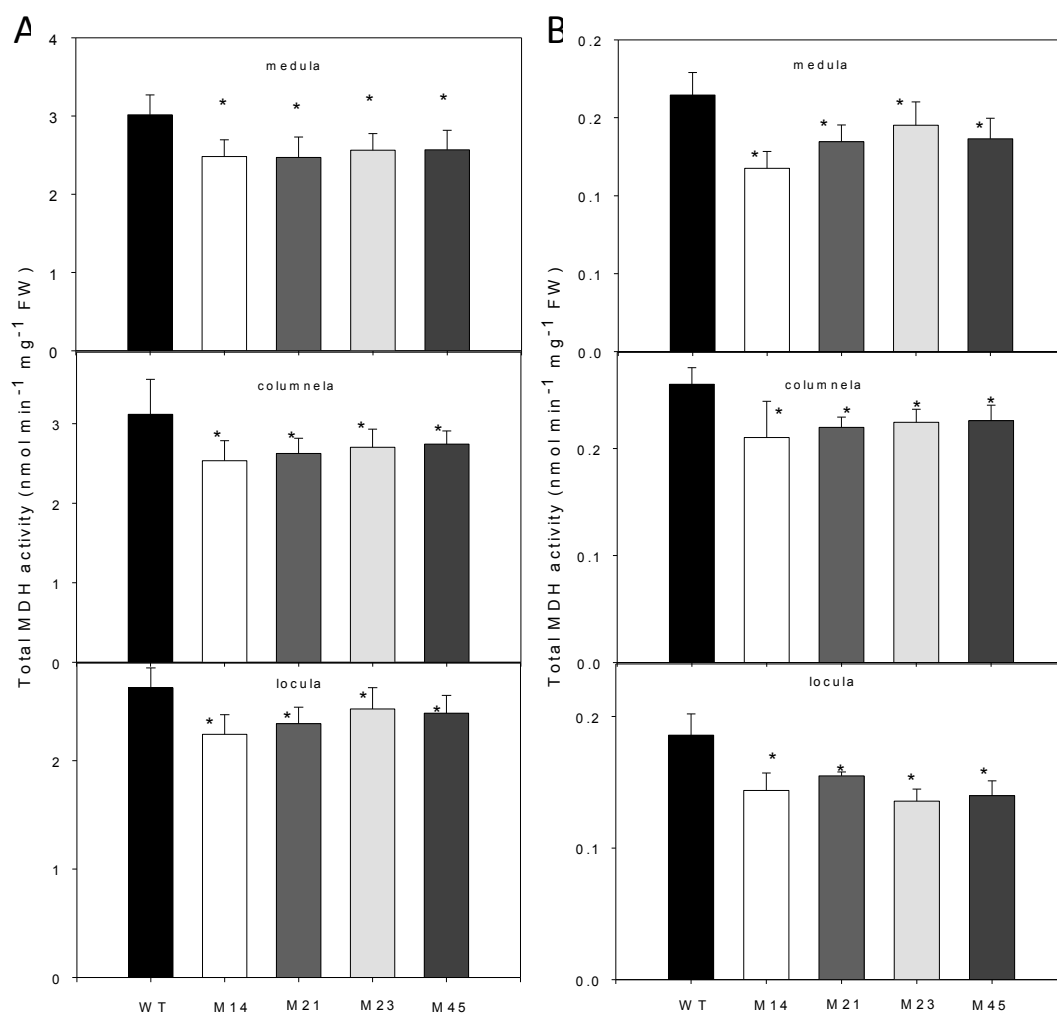

**Supplemental Figure 4.** Total malate dehydrogenase activity in malate dehydrogenase lines in different fruit tissues. The measurements were performed in green fruits with 35 days after flowering (A) and 65 days after flowering (B). The values are presented as the mean  $\pm$  SE of ten biological replicates. An asterisk indicates the values that were determined by the *t*-test to be significantly different ( $P < 0.05$ ) from the wild type.

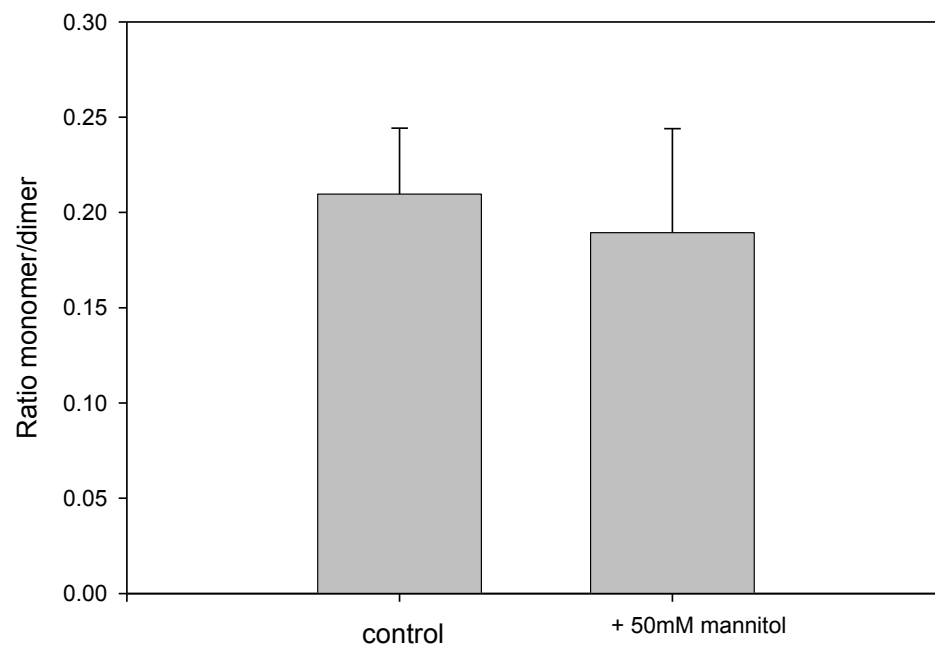

**Supplemental Figure 5.** Evaluation of the dimerization of AGPase following incubation of wild type pericarp discs in 50 mM mannitol. Values are presented as mean  $\pm$  SE of determinations on ten individual plants per line.

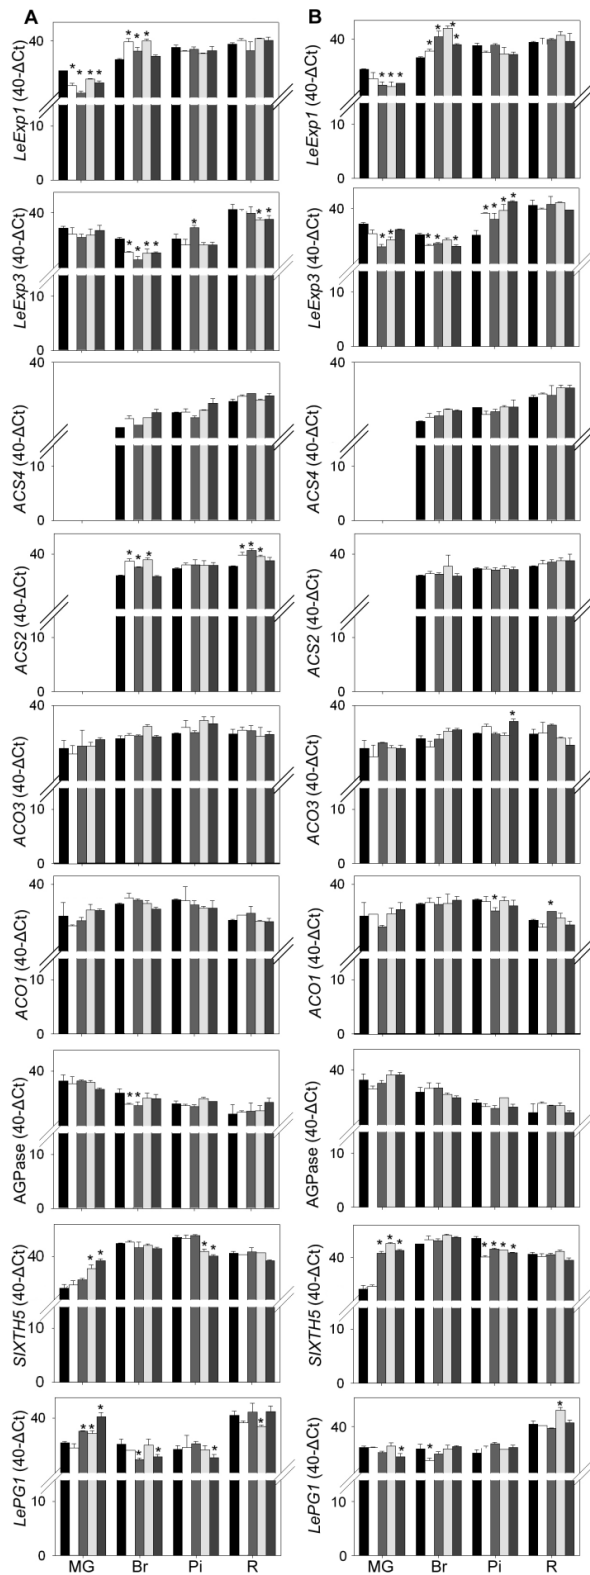

**Supplemental Figure 6.** Expression of ripening related genes of wild type, fumarase (A) and malate dehydrogenase (B) transgenic lines of expansins (*LeExp1*, *LeExp3*); 1-aminocyclopropane-1-carboxylate synthase (*ACS4*, *ACS2*); 1-aminocyclopropane-1-carboxylate oxidase (*ACO3*, *ACO1*); ADP-glucose pyrophosphorylase small subunit (*AGPase*); xyloglucan endotransglucosylase (*SIXTH5*); polygalacturonase (*LePG1*). The values are representative of the mean  $\pm$  SE of six individual plants; an asterisk indicates values determined by the *t*-test to be significantly different from the wild type control ( $P < 0.05$ ). Analysis were determined in different ripening stages. MG, mature green; Br, Breaker; Pi, Pink; R, Red. Wild type, black bars; lines F4 and M14, white bars; lines F6 and M21, gray bars; lines F7 and M23, light gray bars; lines F26 and M45, very dark gray bars.

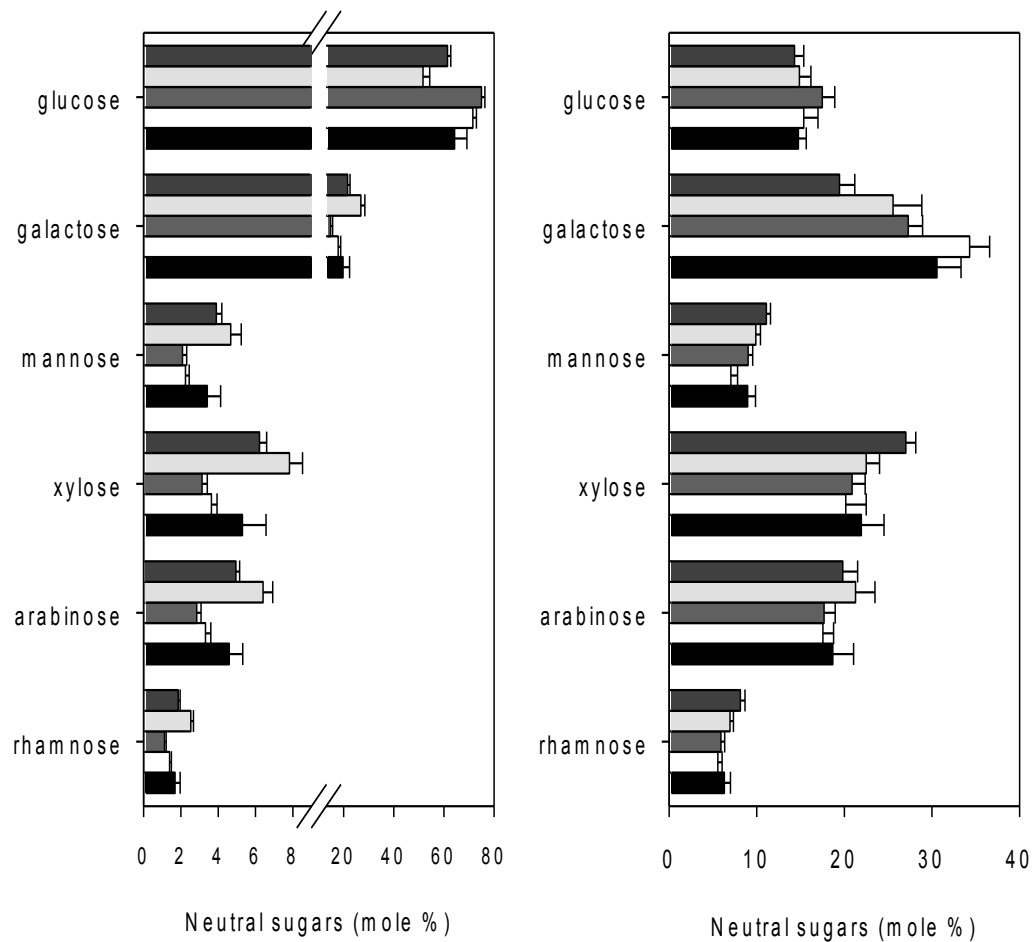

**Supplemental Figure 7.** Composition of cell wall neutral sugars of fruits in the antisense fumarase and malate dehydrogenase lines. The fruits were harvested at 35 (A) and 65 (B) days after flowering in the antisense fumarase and malate dehydrogenase lines. Values are presented as mean  $\pm$  SE of 12 determinations on 4 individual fruits per line. Wild type, black bars; line F4, white bars; line F6, gray bars; M14, light gray bars; M21, dark gray bars.

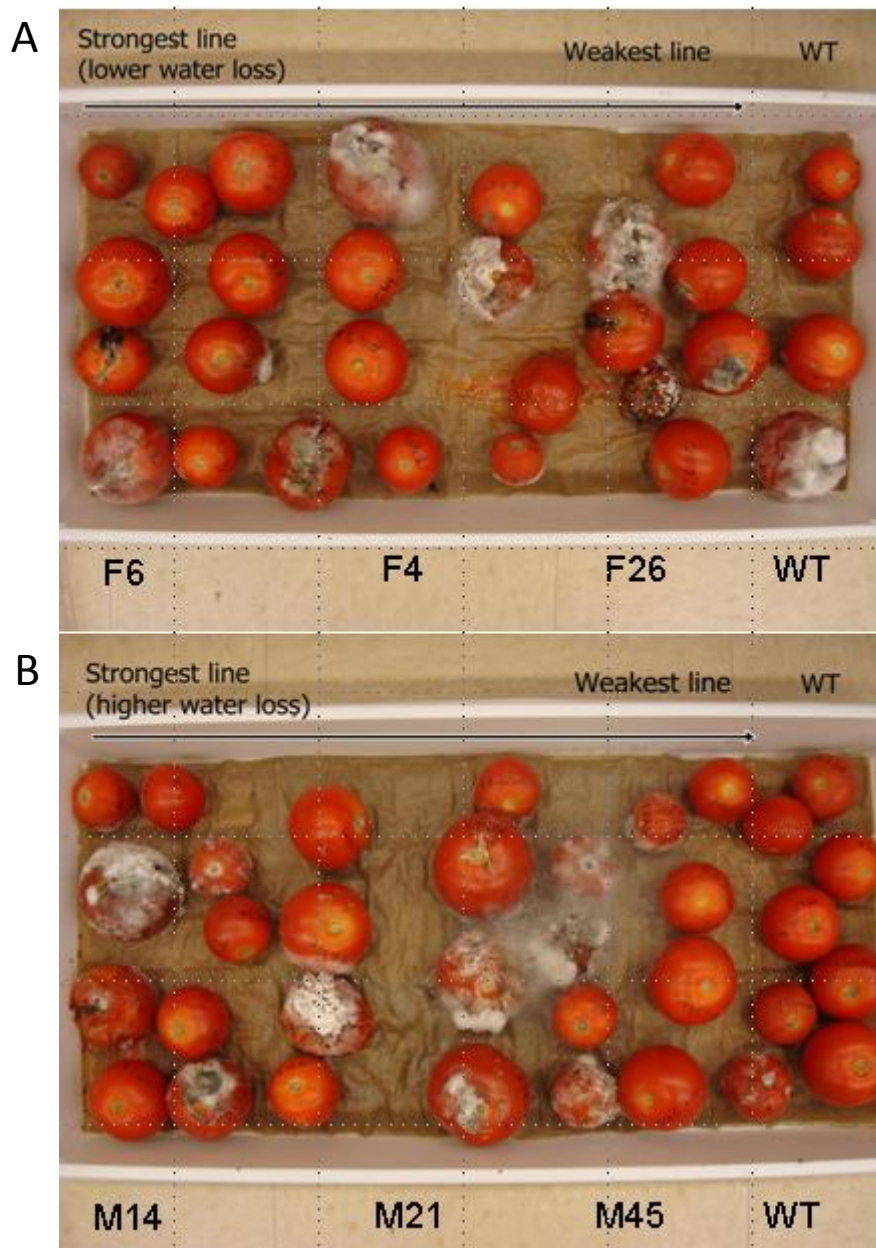

**Supplemental Figure 8.** Opportunistic microbial infection of fruits in the antisense mitochondrial fumarase and malate dehydrogenase lines. Photos of fumarase (A) and malate dehydrogenase (B) fruits of 30 days after detaching from the vine.



**Supplemental Table 1.** Malate and Fumarate content in different tissues of fruits with 35 DAF from wild type and Fumarase antisense plants. Values are presented as the mean  $\pm$  SE of ten biological determinations. The values that are significantly different by *t*-test from the wild type are set in bold type ( $P < 0.05$ ).

| WT                                            | F4                             | F6                             | F7                             | F26                            |
|-----------------------------------------------|--------------------------------|--------------------------------|--------------------------------|--------------------------------|
| malate content ( $\mu\text{mol g}^{-1}$ FW)   |                                |                                |                                |                                |
| <i>medula tissue</i>                          |                                |                                |                                |                                |
| 63.15 $\pm$ 5.89                              | <b>48.54</b> $\pm$ <b>6.45</b> | <b>53.49</b> $\pm$ <b>3.19</b> | <b>50.98</b> $\pm$ <b>2.60</b> | 58.77 $\pm$ 2.08               |
| <i>columnela tissue</i>                       |                                |                                |                                |                                |
| 45.11 $\pm$ 4.07                              | <b>38.25</b> $\pm$ <b>5.01</b> | <b>39.48</b> $\pm$ <b>2.18</b> | 41.22 $\pm$ 2.32               | 42.72 $\pm$ 3.63               |
| <i>locula tissue</i>                          |                                |                                |                                |                                |
| 38.95 $\pm$ 3.66                              | <b>32.81</b> $\pm$ <b>3.25</b> | <b>33.09</b> $\pm$ <b>2.33</b> | 35.07 $\pm$ 3.36               | <b>34.39</b> $\pm$ <b>2.46</b> |
| fumarate content ( $\mu\text{mol g}^{-1}$ FW) |                                |                                |                                |                                |
| <i>medula tissue</i>                          |                                |                                |                                |                                |
| 6.04 $\pm$ 0.90                               | <b>4.71</b> $\pm$ <b>0.77</b>  | <b>4.73</b> $\pm$ <b>0.51</b>  | 5.38 $\pm$ 0.78                | 5.51 $\pm$ 0.56                |
| <i>columnela tissue</i>                       |                                |                                |                                |                                |
| 4.56 $\pm$ 0.46                               | 4.15 $\pm$ 0.45                | 4.72 $\pm$ 0.55                | <b>3.72</b> $\pm$ <b>0.71</b>  | 4.82 $\pm$ 0.46                |
| <i>locula tissue</i>                          |                                |                                |                                |                                |
| 4.20 $\pm$ 0.39                               | 3.66 $\pm$ 0.42                | 3.97 $\pm$ 0.20                | 3.85 $\pm$ 0.51                | 4.14 $\pm$ 0.51                |

**Supplemental Table 2.** Malate and Fumarate content in different tissues of fruits with 35 DAF from wild type and malate dehydrogenase antisense plants. Values are presented as the mean  $\pm$  SE of ten biological determinations. The values that are significantly different by *t*-test from the wild type are set in bold type ( $P < 0.05$ ).

| WT                                            | M14                            | M21                           | M21                            | M45              |
|-----------------------------------------------|--------------------------------|-------------------------------|--------------------------------|------------------|
| malate content ( $\mu\text{mol g}^{-1}$ FW)   |                                |                               |                                |                  |
| <i>medula tissue</i>                          |                                |                               |                                |                  |
| 63.15 $\pm$ 5.89                              | <b>71.94</b> $\pm$ <b>5.91</b> | 65.38 $\pm$ 2.58              | 64.15 $\pm$ 4.54               | 61.92 $\pm$ 5.70 |
| <i>columnela tissue</i>                       |                                |                               |                                |                  |
| 45.11 $\pm$ 4.07                              | 42.48 $\pm$ 3.87               | 43.41 $\pm$ 4.74              | <b>50.97</b> $\pm$ <b>3.26</b> | 46.47 $\pm$ 3.98 |
| <i>locula tissue</i>                          |                                |                               |                                |                  |
| 38.95 $\pm$ 3.66                              | 37.75 $\pm$ 3.12               | 38.26 $\pm$ 1.40              | 38.69 $\pm$ 1.13               | 40.24 $\pm$ 2.27 |
| fumarate content ( $\mu\text{mol g}^{-1}$ FW) |                                |                               |                                |                  |
| <i>medula tissue</i>                          |                                |                               |                                |                  |
| 6.04 $\pm$ 0.90                               | 5.97 $\pm$ 0.39                | <b>4.74</b> $\pm$ <b>0.58</b> | 6.07 $\pm$ 0.31                | 7.02 $\pm$ 1.27  |
| <i>columnela tissue</i>                       |                                |                               |                                |                  |
| 4.56 $\pm$ 0.46                               | 5.00 $\pm$ 0.26                | 4.52 $\pm$ 0.49               | <b>5.50</b> $\pm$ <b>0.82</b>  | 5.12 $\pm$ 0.68  |
| <i>locula tissue</i>                          |                                |                               |                                |                  |
| 4.20 $\pm$ 0.39                               | 4.14 $\pm$ 0.76                | 3.99 $\pm$ 0.26               | 4.31 $\pm$ 0.71                | 4.20 $\pm$ 0.59  |

**Supplemental Table 3.** Starch content in different tissues of fruits with 35 DAF from wild type and Fumarase antisense plants. Values are presented as the mean  $\pm$  SE of ten biological determinations. The values that are significantly different by *t*-test from the wild type are set in bold type ( $P < 0.05$ ).

|                         | <b>WT</b>                           |            | <b>M14</b>   |                    | <b>M21</b>   |                    | <b>M21</b>  |                   | <b>M45</b>  |                   |
|-------------------------|-------------------------------------|------------|--------------|--------------------|--------------|--------------------|-------------|-------------------|-------------|-------------------|
|                         | starch ( $\mu\text{mol g}^{-1}$ FW) |            |              |                    |              |                    |             |                   |             |                   |
| <i>medula tissue</i>    | 64.5                                | $\pm$ 8.62 | <b>110.4</b> | $\pm$ 7.17         | <b>105.1</b> | $\pm$ <b>12.40</b> | <b>84.6</b> | $\pm$ <b>6.78</b> | 71.5        | $\pm$ 7.81        |
| <i>columnela tissue</i> | 58.6                                | $\pm$ 9.69 | <b>84.8</b>  | $\pm$ <b>11.75</b> | <b>76.2</b>  | $\pm$ <b>10.82</b> | <b>68.2</b> | $\pm$ <b>8.84</b> | <b>67.9</b> | $\pm$ <b>7.71</b> |
| <i>locula tissue</i>    | 37.3                                | $\pm$ 7.71 | 34.1         | $\pm$ 6.60         | 35.8         | $\pm$ 8.26         | 34.1        | $\pm$ 5.70        | 34.7        | $\pm$ 7.83        |

**Supplemental Table 4.** Starch content in different tissues of fruits with 35 DAF from wild type and malate dehydrogenase antisense plants. Values are presented as the mean  $\pm$  SE of ten biological determinations. The values that are significantly different by *t*-test from the wild type are set in bold type ( $P < 0.05$ ).

|                         | <b>WT</b>                           |            | <b>M14</b>  |                    | <b>M21</b>  |                   | <b>M21</b> |             | <b>M45</b>  |                   |
|-------------------------|-------------------------------------|------------|-------------|--------------------|-------------|-------------------|------------|-------------|-------------|-------------------|
|                         | starch ( $\mu\text{mol g}^{-1}$ FW) |            |             |                    |             |                   |            |             |             |                   |
| <i>medula tissue</i>    | 64.5                                | $\pm$ 8.62 | <b>44.6</b> | $\pm$ <b>10.35</b> | <b>53.3</b> | $\pm$ <b>6.74</b> | 61.3       | $\pm$ 11.37 | <b>56.9</b> | $\pm$ <b>5.05</b> |
| <i>columnela tissue</i> | 58.6                                | $\pm$ 9.69 | 51.1        | $\pm$ 7.13         | 62.0        | $\pm$ 15.70       | 52.6       | $\pm$ 6.01  | 50.9        | $\pm$ 6.38        |
| <i>locula tissue</i>    | 37.3                                | $\pm$ 7.71 | 33.4        | $\pm$ 7.02         | 34.7        | $\pm$ 8.19        | 32.9       | $\pm$ 5.32  | 37.3        | $\pm$ 6.30        |

**Supplemental Table 5.** Comparison of metabolic levels from pericarp tissue of fruits with 35 DAF from wild type, fumarase and malate dehydrogenase antisense plants. Data are normalized to the mean response calculated for the wild type of each measure batch. Values are presented as the mean  $\pm$  SE of 6 biological determinations. The values that are significantly different by t test from the wild type are set in bold type ( $P < 0.05$ ). Red and blue indicate values that are significantly increased or decreased, respectively.

|                                  | WT   |            | F4          |                   | F6          |                   | M14         |                   | M21         |                   |
|----------------------------------|------|------------|-------------|-------------------|-------------|-------------------|-------------|-------------------|-------------|-------------------|
|                                  | Fold | SE         | Fold        | SE                | Fold        | SE                | Fold        | SE                | Fold        | SE                |
| <b>Amino acids</b>               |      |            |             |                   |             |                   |             |                   |             |                   |
| Alanine, beta                    | 1.00 | $\pm$ 0.09 | <b>0.58</b> | $\pm$ <b>0.03</b> | <b>0.55</b> | $\pm$ <b>0.05</b> | <b>0.25</b> | $\pm$ <b>0.02</b> | <b>0.69</b> | $\pm$ <b>0.07</b> |
| Asparagine                       | 1.00 | $\pm$ 0.13 | <b>0.71</b> | $\pm$ <b>0.06</b> | <b>0.42</b> | $\pm$ <b>0.05</b> | <b>0.23</b> | $\pm$ <b>0.02</b> | <b>0.45</b> | $\pm$ <b>0.02</b> |
| Aspartate                        | 1.00 | $\pm$ 0.06 | <b>0.37</b> | $\pm$ <b>0.02</b> | <b>0.52</b> | $\pm$ <b>0.04</b> | <b>0.34</b> | $\pm$ <b>0.03</b> | <b>0.36</b> | $\pm$ <b>0.03</b> |
| GABA                             | 1.00 | $\pm$ 0.10 | 0.88        | $\pm$ 0.06        | 0.90        | $\pm$ 0.15        | 1.16        | $\pm$ 0.07        | <b>1.33</b> | $\pm$ <b>0.10</b> |
| Glutamate                        | 1.00 | $\pm$ 0.15 | 0.79        | $\pm$ 0.03        | 0.62        | $\pm$ 0.09        | <b>0.24</b> | $\pm$ <b>0.03</b> | <b>0.51</b> | $\pm$ <b>0.09</b> |
| Glutamine                        | 1.00 | $\pm$ 0.10 | <b>0.68</b> | $\pm$ <b>0.06</b> | <b>0.59</b> | $\pm$ <b>0.05</b> | 0.78        | $\pm$ 0.08        | 0.77        | $\pm$ 0.03        |
| Isoleucine                       | 1.00 | $\pm$ 0.08 | 0.80        | $\pm$ 0.08        | 0.92        | $\pm$ 0.10        | <b>0.47</b> | $\pm$ <b>0.06</b> | <b>0.51</b> | $\pm$ <b>0.08</b> |
| Lysine                           | 1.00 | $\pm$ 0.10 | 1.11        | $\pm$ 0.11        | 1.19        | $\pm$ 0.05        | <b>0.73</b> | $\pm$ <b>0.06</b> | <b>0.69</b> | $\pm$ <b>0.02</b> |
| Methionine                       | 1.00 | $\pm$ 0.08 | <b>0.50</b> | $\pm$ <b>0.05</b> | 0.94        | $\pm$ 0.10        | <b>0.35</b> | $\pm$ <b>0.02</b> | <b>0.45</b> | $\pm$ <b>0.03</b> |
| Ornithine                        | 1.00 | $\pm$ 0.10 | <b>1.78</b> | $\pm$ <b>0.16</b> | 1.09        | $\pm$ 0.07        | 1.17        | $\pm$ 0.10        | <b>0.65</b> | $\pm$ 0.07        |
| Phenylalanine                    | 1.00 | $\pm$ 0.13 | 0.78        | $\pm$ 0.07        | <b>1.62</b> | $\pm$ <b>0.05</b> | <b>0.35</b> | $\pm$ <b>0.04</b> | <b>0.63</b> | $\pm$ <b>0.03</b> |
| Proline                          | 1.00 | $\pm$ 0.16 | 0.73        | $\pm$ 0.04        | 0.79        | $\pm$ 0.07        | <b>0.58</b> | $\pm$ <b>0.05</b> | 0.60        | $\pm$ 0.06        |
| Serine                           | 1.00 | $\pm$ 0.12 | 1.31        | $\pm$ 0.11        | 1.05        | $\pm$ 0.10        | 0.90        | $\pm$ 0.07        | 0.73        | $\pm$ 0.09        |
| Threonine                        | 1.00 | $\pm$ 0.08 | 0.92        | $\pm$ 0.09        | 0.96        | $\pm$ 0.07        | 0.94        | $\pm$ 0.10        | <b>0.51</b> | $\pm$ <b>0.06</b> |
| Tryptophan                       | 1.00 | $\pm$ 0.08 | <b>0.68</b> | $\pm$ <b>0.07</b> | 0.88        | $\pm$ 0.06        | <b>0.47</b> | $\pm$ <b>0.05</b> | <b>0.48</b> | $\pm$ <b>0.04</b> |
| Tyrosine                         | 1.00 | $\pm$ 0.09 | 0.96        | $\pm$ 0.07        | <b>1.45</b> | $\pm$ <b>0.06</b> | 0.93        | $\pm$ 0.14        | <b>0.73</b> | $\pm$ <b>0.03</b> |
| Valine                           | 1.00 | $\pm$ 0.09 | <b>0.79</b> | $\pm$ <b>0.05</b> | 0.95        | $\pm$ 0.08        | <b>0.55</b> | $\pm$ <b>0.08</b> | 0.92        | $\pm$ 0.09        |
| <b>Organic acids</b>             |      |            |             |                   |             |                   |             |                   |             |                   |
| Citric acid                      | 1.00 | $\pm$ 0.07 | <b>0.64</b> | $\pm$ <b>0.08</b> | 0.90        | $\pm$ 0.05        | <b>0.84</b> | $\pm$ <b>0.03</b> | 1.02        | $\pm$ 0.06        |
| Fumaric acid                     | 1.00 | $\pm$ 0.04 | <b>0.78</b> | $\pm$ <b>0.02</b> | <b>0.78</b> | $\pm$ <b>0.03</b> | <b>1.46</b> | $\pm$ <b>0.08</b> | <b>1.37</b> | $\pm$ <b>0.03</b> |
| Malic acid                       | 1.00 | $\pm$ 0.03 | <b>0.71</b> | $\pm$ <b>0.04</b> | <b>0.76</b> | $\pm$ <b>0.02</b> | <b>1.29</b> | $\pm$ <b>0.01</b> | <b>1.33</b> | $\pm$ <b>0.06</b> |
| Pyroglutamic acid                | 1.00 | $\pm$ 0.06 | 0.92        | $\pm$ 0.11        | 0.82        | $\pm$ 0.09        | <b>1.21</b> | $\pm$ <b>0.04</b> | 1.08        | $\pm$ 0.09        |
| Saccharic acid                   | 1.00 | $\pm$ 0.02 | <b>0.45</b> | $\pm$ <b>0.01</b> | <b>0.54</b> | $\pm$ <b>0.04</b> | <b>0.60</b> | $\pm$ <b>0.06</b> | <b>0.33</b> | $\pm$ <b>0.06</b> |
| <b>Sugars and Sugars alcohol</b> |      |            |             |                   |             |                   |             |                   |             |                   |
| Fructose                         | 1.00 | $\pm$ 0.04 | <b>0.64</b> | $\pm$ <b>0.03</b> | <b>0.54</b> | $\pm$ <b>0.06</b> | <b>0.61</b> | $\pm$ <b>0.03</b> | <b>0.55</b> | $\pm$ <b>0.07</b> |
| Fructose-6P                      | 1.00 | $\pm$ 0.10 | 0.96        | $\pm$ 0.13        | 0.96        | $\pm$ 0.10        | 0.94        | $\pm$ 0.14        | <b>1.39</b> | $\pm$ <b>0.17</b> |
| Fucose                           | 1.00 | $\pm$ 0.06 | 1.00        | $\pm$ 0.04        | 1.02        | $\pm$ 0.03        | 1.03        | $\pm$ 0.06        | 1.12        | $\pm$ 0.04        |
| Galactinol                       | 1.00 | $\pm$ 0.15 | <b>0.52</b> | $\pm$ <b>0.07</b> | 0.60        | $\pm$ 0.11        | <b>2.24</b> | $\pm$ <b>0.27</b> | <b>0.56</b> | $\pm$ <b>0.08</b> |
| Glucose                          | 1.00 | $\pm$ 0.04 | <b>0.77</b> | $\pm$ <b>0.03</b> | <b>0.69</b> | $\pm$ <b>0.08</b> | <b>0.79</b> | $\pm$ <b>0.05</b> | <b>0.67</b> | $\pm$ <b>0.04</b> |
| Glucose-6P                       | 1.00 | $\pm$ 0.14 | 0.92        | $\pm$ 0.19        | 0.96        | $\pm$ 0.13        | 0.94        | $\pm$ 0.13        | <b>1.53</b> | $\pm$ <b>0.23</b> |
| Maltose                          | 1.00 | $\pm$ 0.11 | 1.04        | $\pm$ 0.11        | <b>0.64</b> | $\pm$ <b>0.05</b> | 0.92        | $\pm$ 0.05        | 0.91        | $\pm$ 0.13        |
| Raffinose                        | 1.00 | $\pm$ 0.10 | 1.24        | $\pm$ 0.21        | <b>1.38</b> | $\pm$ <b>0.09</b> | <b>0.61</b> | $\pm$ <b>0.10</b> | <b>2.00</b> | $\pm$ <b>0.13</b> |
| Rhamnose                         | 1.00 | $\pm$ 0.05 | 1.02        | $\pm$ 0.02        | 0.96        | $\pm$ 0.04        | 1.06        | $\pm$ 0.06        | 1.10        | $\pm$ 0.07        |
| Sucrose                          | 1.00 | $\pm$ 0.05 | 0.99        | $\pm$ 0.06        | 1.10        | $\pm$ 0.04        | <b>0.79</b> | $\pm$ <b>0.05</b> | 1.02        | $\pm$ 0.04        |
| Xylose                           | 1.00 | $\pm$ 0.05 | <b>0.61</b> | $\pm$ <b>0.09</b> | 0.66        | $\pm$ 0.06        | <b>1.22</b> | $\pm$ <b>0.04</b> | 1.06        | $\pm$ 0.04        |
| <b>Miscellaneous</b>             |      |            |             |                   |             |                   |             |                   |             |                   |
| Inositol, myo                    | 1.00 | $\pm$ 0.10 | 0.85        | $\pm$ 0.14        | 1.09        | $\pm$ 0.10        | 0.93        | $\pm$ 0.11        | 1.08        | $\pm$ 0.05        |
| Phosphoric acid                  | 1.00 | $\pm$ 0.10 | 1.04        | $\pm$ 0.12        | <b>1.69</b> | $\pm$ <b>0.03</b> | <b>1.83</b> | $\pm$ <b>0.07</b> | <b>1.87</b> | $\pm$ <b>0.08</b> |
| Putrescine                       | 1.00 | $\pm$ 0.18 | <b>2.41</b> | $\pm$ <b>0.17</b> | <b>2.47</b> | $\pm$ <b>0.25</b> | 0.79        | $\pm$ 0.09        | 1.22        | $\pm$ 0.06        |

**Supplemental Table 6.** Comparison of metabolic levels from columnela tissue of fruits with 35 DAF from wild type, fumarase and malate dehydrogenase antisense plants. Data are normalized to the mean response calculated for the wild type of each measure batch. Values are presented as the mean  $\pm$  SE of 6 biological determinations. The values that are significantly different by t test from the wild type are set in bold type ( $P < 0.05$ ). Red and blue indicate values that are significantly increased or decreased, respectively.

|                                  | WT   |            | F4          |                   | F6          |                   | M14         |                   | M21         |                   |
|----------------------------------|------|------------|-------------|-------------------|-------------|-------------------|-------------|-------------------|-------------|-------------------|
|                                  | Fold | SE         | Fold        | SE                | Fold        | SE                | Fold        | SE                | Fold        | SE                |
| <b>Amino acids</b>               |      |            |             |                   |             |                   |             |                   |             |                   |
| Alanine, beta                    | 1.00 | $\pm$ 0.12 | 0.74        | $\pm$ 0.07        | <b>0.61</b> | $\pm$ <b>0.07</b> | <b>0.15</b> | $\pm$ <b>0.03</b> | 1.05        | $\pm$ 0.07        |
| Asparagine                       | 1.00 | $\pm$ 0.08 | <b>0.66</b> | $\pm$ <b>0.07</b> | <b>0.69</b> | $\pm$ <b>0.1</b>  | <b>0.58</b> | $\pm$ <b>0.07</b> | 1.05        | $\pm$ 0.05        |
| Aspartate                        | 1.00 | $\pm$ 0.14 | <b>0.67</b> | $\pm$ <b>0.03</b> | 0.93        | $\pm$ 0.06        | <b>0.52</b> | $\pm$ <b>0.04</b> | 1.28        | $\pm$ 0.09        |
| GABA                             | 1.00 | $\pm$ 0.04 | <b>0.74</b> | $\pm$ <b>0.06</b> | 1.05        | $\pm$ 0.06        | <b>0.33</b> | $\pm$ <b>0.01</b> | <b>0.73</b> | $\pm$ <b>0.04</b> |
| Glutamate                        | 1.00 | $\pm$ 0.03 | <b>0.67</b> | $\pm$ <b>0.07</b> | <b>0.85</b> | $\pm$ <b>0.06</b> | 0.89        | $\pm$ 0.08        | 0.91        | $\pm$ 0.11        |
| Glutamine                        | 1.00 | $\pm$ 0.09 | 0.86        | $\pm$ 0.07        | 0.84        | $\pm$ 0.05        | 0.82        | $\pm$ 0.09        | 0.94        | $\pm$ 0.07        |
| Isoleucine                       | 1.00 | $\pm$ 0.22 | 1.07        | $\pm$ 0.15        | <b>4.41</b> | $\pm$ <b>0.16</b> | 0.65        | $\pm$ 0.13        | <b>2.91</b> | $\pm$ <b>0.48</b> |
| Lysine                           | 1.00 | $\pm$ 0.07 | 1.00        | $\pm$ 0.09        | <b>1.46</b> | $\pm$ <b>0.11</b> | 0.67        | $\pm$ 0.06        | <b>0.65</b> | $\pm$ <b>0.02</b> |
| Methionine                       | 1.00 | $\pm$ 0.2  | <b>1.50</b> | $\pm$ <b>0.07</b> | <b>3.18</b> | $\pm$ <b>0.20</b> | 0.83        | $\pm$ 0.14        | <b>3.31</b> | $\pm$ <b>0.17</b> |
| Ornithine                        | 1.00 | $\pm$ 0.06 | <b>0.40</b> | $\pm$ <b>0.03</b> | <b>0.25</b> | $\pm$ <b>0.02</b> | <b>0.39</b> | $\pm$ <b>0.04</b> | <b>1.23</b> | $\pm$ <b>0.05</b> |
| Phenylalanine                    | 1.00 | $\pm$ 0.13 | 1.13        | $\pm$ 0.07        | <b>4.58</b> | $\pm$ <b>0.28</b> | <b>0.51</b> | $\pm$ <b>0.05</b> | <b>1.77</b> | $\pm$ <b>0.01</b> |
| Proline                          | 1.00 | $\pm$ 0.07 | 0.81        | $\pm$ 0.07        | 0.87        | $\pm$ 0.11        | <b>0.66</b> | $\pm$ <b>0.07</b> | <b>1.27</b> | $\pm$ <b>0.11</b> |
| Serine                           | 1.00 | $\pm$ 0.11 | 0.91        | $\pm$ 0.09        | 0.99        | $\pm$ 0.10        | 0.97        | $\pm$ 0.11        | 1.24        | $\pm$ 0.08        |
| Threonine                        | 1.00 | $\pm$ 0.14 | 0.88        | $\pm$ 0.06        | <b>2.39</b> | $\pm$ <b>0.21</b> | <b>0.52</b> | $\pm$ <b>0.04</b> | <b>1.51</b> | $\pm$ <b>0.14</b> |
| Tryptophan                       | 1.00 | $\pm$ 0.11 | <b>3.46</b> | $\pm$ <b>0.30</b> | <b>6.75</b> | $\pm$ <b>0.19</b> | <b>1.88</b> | $\pm$ <b>0.18</b> | <b>6.98</b> | $\pm$ <b>0.47</b> |
| Tyrosine                         | 1.00 | $\pm$ 0.11 | <b>1.50</b> | $\pm$ <b>0.04</b> | <b>5.04</b> | $\pm$ <b>0.3</b>  | 0.91        | $\pm$ 0.12        | <b>2.45</b> | $\pm$ <b>0.26</b> |
| Valine                           | 1.00 | $\pm$ 0.18 | 0.92        | $\pm$ 0.10        | <b>3.64</b> | $\pm$ <b>0.18</b> | <b>0.61</b> | $\pm$ <b>0.07</b> | 1.43        | $\pm$ 0.17        |
| <b>Organic acids</b>             |      |            |             |                   |             |                   |             |                   |             |                   |
| Citric acid                      | 1.00 | $\pm$ 0.05 | 0.88        | $\pm$ 0.1         | 0.94        | $\pm$ 0.04        | 0.95        | $\pm$ 0.12        | 1.31        | $\pm$ 0.05        |
| Fumaric acid                     | 1.00 | $\pm$ 0.06 | <b>0.71</b> | $\pm$ <b>0.07</b> | 0.90        | $\pm$ 0.03        | 1.13        | $\pm$ 0.03        | 1.30        | $\pm$ 0.05        |
| Malic acid                       | 1.00 | $\pm$ 0.06 | <b>0.70</b> | $\pm$ <b>0.05</b> | <b>0.58</b> | $\pm$ <b>0.04</b> | 0.92        | $\pm$ 0.04        | 1.05        | $\pm$ 0.06        |
| Pyroglutamic acid                | 1.00 | $\pm$ 0.11 | <b>0.64</b> | $\pm$ <b>0.07</b> | 1.09        | $\pm$ 0.10        | <b>0.52</b> | $\pm$ <b>0.04</b> | 0.78        | $\pm$ 0.1         |
| Saccharic acid                   | 1.00 | $\pm$ 0.04 | <b>0.42</b> | $\pm$ <b>0.03</b> | 0.36        | $\pm$ 0.03        | 0.97        | $\pm$ 0.11        | 0.25        | $\pm$ 0.05        |
| <b>Sugars and Sugars alcohol</b> |      |            |             |                   |             |                   |             |                   |             |                   |
| Fructose                         | 1.00 | $\pm$ 0.03 | <b>1.14</b> | $\pm$ <b>0.04</b> | 0.96        | $\pm$ 0.05        | 0.87        | $\pm$ 0.09        | 1.14        | $\pm$ 0.07        |
| Fructose-6P                      | 1.00 | $\pm$ 0.08 | <b>1.24</b> | $\pm$ <b>0.06</b> | 1.09        | $\pm$ 0.05        | 1.01        | $\pm$ 0.06        | <b>1.26</b> | $\pm$ <b>0.06</b> |
| Fucose                           | 1.00 | $\pm$ 0.05 | 0.90        | $\pm$ 0.07        | 1.01        | $\pm$ 0.05        | 1.00        | $\pm$ 0.08        | 0.94        | $\pm$ 0.05        |
| Galactinol                       | 1.00 | $\pm$ 0.07 | <b>0.46</b> | $\pm$ <b>0.06</b> | <b>0.61</b> | $\pm$ <b>0.06</b> | <b>1.52</b> | $\pm$ <b>0.16</b> | 1.09        | $\pm$ 0.06        |
| Glucose                          | 1.00 | $\pm$ 0.08 | 0.96        | $\pm$ 0.04        | 1.11        | $\pm$ 0.04        | <b>0.72</b> | $\pm$ <b>0.05</b> | 1.19        | $\pm$ 0.03        |
| Glucose-6P                       | 1.00 | $\pm$ 0.11 | 1.24        | $\pm$ 0.10        | 1.03        | $\pm$ 0.06        | 0.95        | $\pm$ 0.06        | 1.2         | $\pm$ 0.04        |
| Maltose                          | 1.00 | $\pm$ 0.07 | 0.86        | $\pm$ 0.08        | <b>0.74</b> | $\pm$ <b>0.06</b> | 1.03        | $\pm$ 0.09        | 1.08        | $\pm$ 0.12        |
| Raffinose                        | 1.00 | $\pm$ 0.05 | 1.03        | $\pm$ 0.13        | <b>0.71</b> | $\pm$ <b>0.04</b> | <b>0.81</b> | $\pm$ <b>0.06</b> | <b>1.61</b> | $\pm$ <b>0.14</b> |
| Rhamnose                         | 1.00 | $\pm$ 0.08 | 1.03        | $\pm$ 0.15        | 0.99        | $\pm$ 0.13        | 1.04        | $\pm$ 0.08        | 0.83        | $\pm$ 0.07        |
| Sucrose                          | 1.00 | $\pm$ 0.07 | 0.94        | $\pm$ 0.04        | 0.96        | $\pm$ 0.04        | 0.94        | $\pm$ 0.06        | 1.15        | $\pm$ 0.02        |
| Xylose                           | 1.00 | $\pm$ 0.11 | 1.2         | $\pm$ 0.03        | 1.12        | $\pm$ 0.18        | <b>1.29</b> | $\pm$ <b>0.09</b> | 1.11        | $\pm$ 0.17        |
| <b>Miscellaneous</b>             |      |            |             |                   |             |                   |             |                   |             |                   |
| Inositol, myo                    | 1.00 | $\pm$ 0.07 | <b>0.48</b> | $\pm$ <b>0.06</b> | <b>0.67</b> | $\pm$ <b>0.06</b> | <b>0.62</b> | $\pm$ <b>0.08</b> | <b>1.68</b> | $\pm$ <b>0.07</b> |
| Phosphoric acid                  | 1.00 | $\pm$ 0.10 | 0.96        | $\pm$ 0.11        | <b>1.35</b> | $\pm$ <b>0.10</b> | 0.91        | $\pm$ 0.08        | 0.97        | $\pm$ 0.03        |
| Putrescine                       | 1.00 | $\pm$ 0.16 | <b>1.85</b> | $\pm$ <b>0.15</b> | 0.82        | $\pm$ 0.05        | 0.77        | $\pm$ 0.06        | 1.03        | $\pm$ 0.05        |

**Supplemental Table 7.** Comparison of metabolic levels from medula tissue of fruits with 35 DAF from wild type, fumarase and malate dehydrogenase antisense plants. Data are normalized to the mean response calculated for the wild type of each measure batch. Values are presented as the mean  $\pm$  SE of 6 biological determinations. The values that are significantly different by t test from the wild type are set in bold type ( $P < 0.05$ ). Red and blue indicate values that are significantly increased or decreased, respectively.

|                                  | WT              |    | F4                                |    | F6                                |    | M14                               |    | M21                               |    |
|----------------------------------|-----------------|----|-----------------------------------|----|-----------------------------------|----|-----------------------------------|----|-----------------------------------|----|
|                                  | Fold            | SE | Fold                              | SE | Fold                              | SE | Fold                              | SE | Fold                              | SE |
| <b>Amino acids</b>               |                 |    |                                   |    |                                   |    |                                   |    |                                   |    |
| Alanine, beta                    | 1.00 $\pm$ 0.12 |    | 1.20 $\pm$ 0.14                   |    | <b>1.62 <math>\pm</math> 0.16</b> |    | <b>0.42 <math>\pm</math> 0.09</b> |    | 0.94 $\pm$ 0.16                   |    |
| Asparagine                       | 1.00 $\pm$ 0.13 |    | 0.92 $\pm$ 0.06                   |    | 1.03 $\pm$ 0.06                   |    | 0.95 $\pm$ 0.07                   |    | 1.10 $\pm$ 0.07                   |    |
| Aspartate                        | 1.00 $\pm$ 0.05 |    | <b>0.79 <math>\pm</math> 0.08</b> |    | <b>0.71 <math>\pm</math> 0.04</b> |    | <b>0.67 <math>\pm</math> 0.07</b> |    | 1.01 $\pm$ 0.08                   |    |
| GABA                             | 1.00 $\pm$ 0.06 |    | <b>0.86 <math>\pm</math> 0.03</b> |    | 1.10 $\pm$ 0.03                   |    | <b>0.46 <math>\pm</math> 0.03</b> |    | <b>0.68 <math>\pm</math> 0.02</b> |    |
| Glutamate                        | 1.00 $\pm$ 0.11 |    | 0.98 $\pm$ 0.06                   |    | 0.96 $\pm$ 0.08                   |    | <b>0.64 <math>\pm</math> 0.10</b> |    | 1.21 $\pm$ 0.12                   |    |
| Glutamine                        | 1.00 $\pm$ 0.10 |    | <b>1.96 <math>\pm</math> 0.06</b> |    | <b>1.58 <math>\pm</math> 0.10</b> |    | <b>2.33 <math>\pm</math> 0.18</b> |    | <b>2.82 <math>\pm</math> 0.23</b> |    |
| Isoleucine                       | 1.00 $\pm$ 0.22 |    | 1.35 $\pm$ 0.13                   |    | <b>4.35 <math>\pm</math> 0.30</b> |    | 1.05 $\pm$ 0.26                   |    | <b>2.66 <math>\pm</math> 0.44</b> |    |
| Lysine                           | 1.00 $\pm$ 0.07 |    | <b>1.54 <math>\pm</math> 0.14</b> |    | <b>2.58 <math>\pm</math> 0.17</b> |    | 1.06 $\pm$ 0.08                   |    | <b>2.25 <math>\pm</math> 0.31</b> |    |
| Methionine                       | 1.00 $\pm$ 0.11 |    | 1.08 $\pm$ 0.15                   |    | <b>1.56 <math>\pm</math> 0.19</b> |    | <b>0.54 <math>\pm</math> 0.08</b> |    | 0.86 $\pm$ 0.06                   |    |
| Ornithine                        | 1.00 $\pm$ 0.10 |    | <b>1.92 <math>\pm</math> 0.25</b> |    | <b>2.63 <math>\pm</math> 0.09</b> |    | 0.86 $\pm$ 0.09                   |    | <b>1.60 <math>\pm</math> 0.10</b> |    |
| Phenylalanine                    | 1.00 $\pm$ 0.14 |    | <b>1.53 <math>\pm</math> 0.12</b> |    | <b>4.25 <math>\pm</math> 0.36</b> |    | 0.95 $\pm$ 0.07                   |    | <b>2.55 <math>\pm</math> 0.20</b> |    |
| Proline                          | 1.00 $\pm$ 0.09 |    | 0.93 $\pm$ 0.05                   |    | 1.08 $\pm$ 0.15                   |    | <b>0.60 <math>\pm</math> 0.07</b> |    | 0.89 $\pm$ 0.09                   |    |
| Serine                           | 1.00 $\pm$ 0.06 |    | 1.12 $\pm$ 0.05                   |    | 0.93 $\pm$ 0.12                   |    | <b>1.23 <math>\pm</math> 0.05</b> |    | 1.20 $\pm$ 0.10                   |    |
| Threonine                        | 1.00 $\pm$ 0.08 |    | 1.23 $\pm$ 0.14                   |    | <b>2.38 <math>\pm</math> 0.19</b> |    | 0.82 $\pm$ 0.08                   |    | <b>1.84 <math>\pm</math> 0.15</b> |    |
| Tryptophan                       | 1.00 $\pm$ 0.14 |    | 1.05 $\pm$ 0.03                   |    | <b>2.37 <math>\pm</math> 0.17</b> |    | 1.04 $\pm$ 0.15                   |    | <b>4.69 <math>\pm</math> 0.11</b> |    |
| Tyrosine                         | 1.00 $\pm$ 0.18 |    | 1.25 $\pm$ 0.10                   |    | <b>1.45 <math>\pm</math> 0.14</b> |    | 1.09 $\pm$ 0.14                   |    | <b>2.36 <math>\pm</math> 0.13</b> |    |
| Valine                           | 1.00 $\pm$ 0.07 |    | <b>1.77 <math>\pm</math> 0.16</b> |    | <b>2.43 <math>\pm</math> 0.12</b> |    | 0.99 $\pm$ 0.08                   |    | <b>1.55 <math>\pm</math> 0.03</b> |    |
| <b>Organic acids</b>             |                 |    |                                   |    |                                   |    |                                   |    |                                   |    |
| Citric acid                      | 1.00 $\pm$ 0.08 |    | <b>0.71 <math>\pm</math> 0.08</b> |    | <b>0.49 <math>\pm</math> 0.05</b> |    | <b>0.69 <math>\pm</math> 0.05</b> |    | <b>0.69 <math>\pm</math> 0.05</b> |    |
| Fumaric acid                     | 1.00 $\pm$ 0.05 |    | <b>0.71 <math>\pm</math> 0.04</b> |    | <b>0.73 <math>\pm</math> 0.04</b> |    | <b>1.32 <math>\pm</math> 0.04</b> |    | <b>1.41 <math>\pm</math> 0.05</b> |    |
| Malic acid                       | 1.00 $\pm$ 0.05 |    | <b>0.75 <math>\pm</math> 0.05</b> |    | <b>0.51 <math>\pm</math> 0.04</b> |    | 1.03 $\pm$ 0.03                   |    | 1.06 $\pm$ 0.02                   |    |
| Pyroglutamic acid                | 1.00 $\pm$ 0.13 |    | <b>1.53 <math>\pm</math> 0.15</b> |    | 1.21 $\pm$ 0.09                   |    | 0.93 $\pm$ 0.05                   |    | 1.22 $\pm$ 0.09                   |    |
| Saccharic acid                   | 1.00 $\pm$ 0.08 |    | <b>0.34 <math>\pm</math> 0.03</b> |    | <b>0.35 <math>\pm</math> 0.05</b> |    | <b>0.46 <math>\pm</math> 0.04</b> |    | <b>0.16 <math>\pm</math> 0.02</b> |    |
| <b>Sugars and Sugars alcohol</b> |                 |    |                                   |    |                                   |    |                                   |    |                                   |    |
| Fructose                         | 1.00 $\pm$ 0.06 |    | <b>0.71 <math>\pm</math> 0.03</b> |    | <b>0.66 <math>\pm</math> 0.07</b> |    | <b>0.66 <math>\pm</math> 0.03</b> |    | <b>0.72 <math>\pm</math> 0.05</b> |    |
| Fructose-6P                      | 1.00 $\pm$ 0.02 |    | 0.87 $\pm$ 0.08                   |    | 1.04 $\pm$ 0.06                   |    | <b>0.82 <math>\pm</math> 0.07</b> |    | <b>1.49 <math>\pm</math> 0.06</b> |    |
| Fucose                           | 1.00 $\pm$ 0.05 |    | 0.9 $\pm$ 0.07                    |    | 1.03 $\pm$ 0.05                   |    | 1.02 $\pm$ 0.07                   |    | 0.98 $\pm$ 0.11                   |    |
| Galactinol                       | 1.00 $\pm$ 0.08 |    | 0.92 $\pm$ 0.07                   |    | <b>0.64 <math>\pm</math> 0.06</b> |    | 1.10 $\pm$ 0.13                   |    | 1.00 $\pm$ 0.04                   |    |
| Glucose                          | 1.00 $\pm$ 0.05 |    | <b>0.72 <math>\pm</math> 0.06</b> |    | <b>0.81 <math>\pm</math> 0.09</b> |    | <b>0.78 <math>\pm</math> 0.01</b> |    | <b>0.77 <math>\pm</math> 0.08</b> |    |
| Glucose-6P                       | 1.00 $\pm$ 0.06 |    | 1.07 $\pm$ 0.17                   |    | 1.18 $\pm$ 0.09                   |    | <b>0.79 <math>\pm</math> 0.06</b> |    | <b>1.39 <math>\pm</math> 0.14</b> |    |
| Maltose                          | 1.00 $\pm$ 0.04 |    | <b>0.57 <math>\pm</math> 0.03</b> |    | <b>0.54 <math>\pm</math> 0.02</b> |    | 1.08 $\pm$ 0.11                   |    | <b>0.64 <math>\pm</math> 0.08</b> |    |
| Raffinose                        | 1.00 $\pm$ 0.28 |    | <b>1.78 <math>\pm</math> 0.23</b> |    | <b>2.06 <math>\pm</math> 0.17</b> |    | 1.15 $\pm$ 0.13                   |    | <b>2.48 <math>\pm</math> 0.09</b> |    |
| Rhamnose                         | 1.00 $\pm$ 0.06 |    | 1.01 $\pm$ 0.12                   |    | 1.18 $\pm$ 0.13                   |    | 1.15 $\pm$ 0.12                   |    | 1.08 $\pm$ 0.22                   |    |
| Sucrose                          | 1.00 $\pm$ 0.07 |    | 1.06 $\pm$ 0.07                   |    | <b>1.28 <math>\pm</math> 0.08</b> |    | 0.97 $\pm$ 0.09                   |    | 1.12 $\pm$ 0.06                   |    |
| Xylose                           | 1.00 $\pm$ 0.19 |    | 1.11 $\pm$ 0.13                   |    | 1.19 $\pm$ 0.12                   |    | 1.35 $\pm$ 0.2                    |    | 1.24 $\pm$ 0.13                   |    |
| <b>Miscellaneous</b>             |                 |    |                                   |    |                                   |    |                                   |    |                                   |    |
| Inositol, myo                    | 1.00 $\pm$ 0.08 |    | 0.89 $\pm$ 0.07                   |    | 0.9 $\pm$ 0.07                    |    | 0.87 $\pm$ 0.07                   |    | <b>1.81 <math>\pm</math> 0.18</b> |    |
| Phosphoric acid                  | 1.00 $\pm$ 0.06 |    | 0.88 $\pm$ 0.06                   |    | <b>0.68 <math>\pm</math> 0.02</b> |    | <b>0.67 <math>\pm</math> 0.03</b> |    | <b>0.68 <math>\pm</math> 0.04</b> |    |
| Putrescine                       | 1.00 $\pm$ 0.09 |    | 1.14 $\pm$ 0.13                   |    | 0.98 $\pm$ 0.06                   |    | 0.89 $\pm$ 0.05                   |    | <b>0.76 <math>\pm</math> 0.03</b> |    |

**Supplemental Table 8.** Comparison of metabolic levels from locula tissue of fruits with 35 DAF from wild type, fumarase and malate dehydrogenase antisense plants. Data are normalized to the mean response calculated for the wild type of each measure batch. Values are presented as the mean  $\pm$  SE of 6 biological determinations. The values that are significantly different by t test from the wild type are set in bold type ( $P < 0.05$ ). Red and blue indicate values that are significantly increased or decreased, respectively.

|                                  | WT   |            | F4          |                   | F6          |                   | M14         |                   | M21         |                   |
|----------------------------------|------|------------|-------------|-------------------|-------------|-------------------|-------------|-------------------|-------------|-------------------|
|                                  | Fold | SE         | Fold        | SE                | Fold        | SE                | Fold        | SE                | Fold        | SE                |
| <b>Amino acids</b>               |      |            |             |                   |             |                   |             |                   |             |                   |
| Alanine, beta                    | 1.00 | $\pm$ 0.12 | <b>0.54</b> | $\pm$ <b>0.04</b> | 0.88        | $\pm$ 0.10        | 1.00        | $\pm$ 0.05        | 0.93        | $\pm$ 0.06        |
| Asparagine                       | 1.00 | $\pm$ 0.11 | <b>1.38</b> | $\pm$ <b>0.12</b> | 1.07        | $\pm$ 0.09        | <b>1.90</b> | $\pm$ <b>0.10</b> | <b>1.93</b> | $\pm$ <b>0.07</b> |
| Aspartate                        | 1.00 | $\pm$ 0.07 | <b>0.24</b> | $\pm$ <b>0.01</b> | <b>0.35</b> | $\pm$ <b>0.02</b> | <b>0.26</b> | $\pm$ <b>0.01</b> | <b>0.50</b> | $\pm$ <b>0.02</b> |
| GABA                             | 1.00 | $\pm$ 0.06 | <b>0.73</b> | $\pm$ <b>0.04</b> | 0.91        | $\pm$ 0.04        | <b>0.39</b> | $\pm$ <b>0.02</b> | <b>0.55</b> | $\pm$ <b>0.05</b> |
| Glutamate                        | 1.00 | $\pm$ 0.10 | <b>1.27</b> | $\pm$ <b>0.09</b> | <b>1.39</b> | $\pm$ <b>0.10</b> | 0.92        | $\pm$ 0.07        | <b>1.36</b> | $\pm$ <b>0.14</b> |
| Glutamine                        | 1.00 | $\pm$ 0.10 | 0.89        | $\pm$ 0.07        | <b>0.66</b> | $\pm$ <b>0.07</b> | <b>0.6</b>  | $\pm$ <b>0.03</b> | 1.01        | $\pm$ 0.04        |
| Isoleucine                       | 1.00 | $\pm$ 0.08 | <b>0.32</b> | $\pm$ <b>0.05</b> | 0.89        | $\pm$ 0.10        | <b>0.25</b> | $\pm$ <b>0.04</b> | 1.09        | $\pm$ 0.09        |
| Lysine                           | 1.00 | $\pm$ 0.03 | <b>1.18</b> | $\pm$ <b>0.04</b> | <b>0.78</b> | $\pm$ 0.10        | <b>0.53</b> | $\pm$ <b>0.19</b> | <b>0.43</b> | $\pm$ <b>0.01</b> |
| Methionine                       | 1.00 | $\pm$ 0.08 | <b>0.43</b> | $\pm$ <b>0.05</b> | <b>0.65</b> | $\pm$ 0.06        | <b>0.49</b> | $\pm$ <b>0.05</b> | <b>0.68</b> | $\pm$ <b>0.04</b> |
| Ornithine                        | 1.00 | $\pm$ 0.11 | <b>1.29</b> | $\pm$ <b>0.09</b> | 0.73        | $\pm$ 0.08        | <b>0.70</b> | $\pm$ <b>0.07</b> | 1.07        | $\pm$ 0.13        |
| Phenylalanine                    | 1.00 | $\pm$ 0.14 | <b>0.39</b> | $\pm$ <b>0.05</b> | 0.8         | $\pm$ 0.09        | <b>0.25</b> | $\pm$ <b>0.03</b> | 1.38        | $\pm$ 0.15        |
| Proline                          | 1.00 | $\pm$ 0.12 | <b>0.41</b> | $\pm$ <b>0.04</b> | <b>0.58</b> | $\pm$ 0.04        | <b>0.4</b>  | $\pm$ <b>0.05</b> | <b>0.62</b> | $\pm$ <b>0.03</b> |
| Serine                           | 1.00 | $\pm$ 0.11 | 1.02        | $\pm$ 0.09        | 1.06        | $\pm$ 0.09        | 0.99        | $\pm$ 0.04        | 0.83        | $\pm$ 0.06        |
| Threonine                        | 1.00 | $\pm$ 0.14 | <b>0.41</b> | $\pm$ <b>0.03</b> | 0.70        | $\pm$ 0.03        | <b>0.39</b> | $\pm$ <b>0.02</b> | <b>0.40</b> | $\pm$ <b>0.03</b> |
| Tryptophan                       | 1.00 | $\pm$ 0.08 | <b>0.46</b> | $\pm$ <b>0.05</b> | 0.86        | $\pm$ 0.03        | <b>0.74</b> | $\pm$ <b>0.04</b> | <b>0.50</b> | $\pm$ <b>0.07</b> |
| Tyrosine                         | 1.00 | $\pm$ 0.09 | <b>0.32</b> | $\pm$ <b>0.04</b> | 0.79        | $\pm$ 0.07        | <b>0.30</b> | $\pm$ <b>0.04</b> | <b>0.56</b> | $\pm$ <b>0.07</b> |
| Valine                           | 1.00 | $\pm$ 0.09 | 0.78        | $\pm$ 0.09        | 0.84        | $\pm$ 0.08        | <b>0.29</b> | $\pm$ <b>0.02</b> | <b>1.34</b> | $\pm$ <b>0.13</b> |
| <b>Organic acids</b>             |      |            |             |                   |             |                   |             |                   |             |                   |
| Citric acid                      | 1.00 | $\pm$ 0.09 | 0.93        | $\pm$ 0.19        | <b>0.50</b> | $\pm$ <b>0.01</b> | 0.71        | $\pm$ 0.14        | <b>1.28</b> | $\pm$ <b>0.04</b> |
| Fumaric acid                     | 1.00 | $\pm$ 0.04 | <b>0.65</b> | $\pm$ <b>0.03</b> | 0.91        | $\pm$ 0.05        | 0.93        | $\pm$ 0.10        | 0.98        | $\pm$ 0.07        |
| Malic acid                       | 1.00 | $\pm$ 0.08 | <b>0.45</b> | $\pm$ <b>0.07</b> | <b>0.37</b> | $\pm$ <b>0.10</b> | 0.78        | $\pm$ 0.12        | 0.85        | $\pm$ 0.05        |
| Pyroglutamic acid                | 1.00 | $\pm$ 0.04 | <b>1.89</b> | $\pm$ <b>0.18</b> | <b>1.72</b> | $\pm$ <b>0.19</b> | <b>1.47</b> | $\pm$ <b>0.11</b> | <b>1.68</b> | $\pm$ <b>0.05</b> |
| Saccharic acid                   | 1.00 | $\pm$ 0.09 | <b>0.58</b> | $\pm$ <b>0.09</b> | <b>0.63</b> | $\pm$ <b>0.11</b> | 0.84        | $\pm$ 0.06        | <b>0.34</b> | $\pm$ <b>0.03</b> |
| <b>Sugars and Sugars alcohol</b> |      |            |             |                   |             |                   |             |                   |             |                   |
| Fructose                         | 1.00 | $\pm$ 0.04 | 0.99        | $\pm$ 0           | <b>0.77</b> | $\pm$ <b>0.05</b> | <b>0.62</b> | $\pm$ <b>0.03</b> | <b>0.71</b> | $\pm$ <b>0.05</b> |
| Fructose-6P                      | 1.00 | $\pm$ 0.11 | 1.05        | $\pm$ 0.13        | 1.35        | $\pm$ 0.17        | 0.78        | $\pm$ 0.12        | 1.02        | $\pm$ 0.06        |
| Fucose                           | 1.00 | $\pm$ 0.08 | 1.06        | $\pm$ 0.04        | 1.20        | $\pm$ 0.13        | 1.11        | $\pm$ 0.02        | 1.10        | $\pm$ 0.03        |
| Galactinol                       | 1.00 | $\pm$ 0.22 | 0.99        | $\pm$ 0.13        | 1.10        | $\pm$ 0.11        | <b>3.03</b> | $\pm$ <b>0.13</b> | <b>3.58</b> | $\pm$ <b>0.21</b> |
| Glucose                          | 1.00 | $\pm$ 0.04 | <b>1.16</b> | $\pm$ <b>0.03</b> | <b>1.28</b> | $\pm$ <b>0.03</b> | <b>1.32</b> | $\pm$ <b>0.17</b> | <b>1.56</b> | $\pm$ <b>0.07</b> |
| Glucose-6P                       | 1.00 | $\pm$ 0.09 | 0.93        | $\pm$ 0.18        | 1.32        | $\pm$ 0.26        | 0.8         | $\pm$ 0.18        | 1.13        | $\pm$ 0.12        |
| Maltose                          | 1.00 | $\pm$ 0.09 | 1.21        | $\pm$ 0.11        | 0.96        | $\pm$ 0.09        | <b>1.35</b> | $\pm$ <b>0.13</b> | 1.04        | $\pm$ 0.09        |
| Raffinose                        | 1.00 | $\pm$ 0.21 | 1.16        | $\pm$ 0.17        | <b>2.68</b> | $\pm$ <b>0.26</b> | 1.28        | $\pm$ 0.17        | <b>2.11</b> | $\pm$ <b>0.14</b> |
| Rhamnose                         | 1.00 | $\pm$ 0.06 | 1.19        | $\pm$ 0.10        | 1.12        | $\pm$ 0.05        | <b>1.24</b> | $\pm$ <b>0.10</b> | 1.10        | $\pm$ 0.06        |
| Sucrose                          | 1.00 | $\pm$ 0.11 | 1.10        | $\pm$ 0.12        | <b>1.37</b> | $\pm$ <b>0.11</b> | 1.27        | $\pm$ 0.16        | 1.37        | $\pm$ 0.15        |
| Xylose                           | 1.00 | $\pm$ 0.13 | 1.24        | $\pm$ 0.12        | 0.98        | $\pm$ 0.07        | <b>1.62</b> | $\pm$ <b>0.05</b> | <b>1.45</b> | $\pm$ <b>0.14</b> |
| <b>Miscellaneous</b>             |      |            |             |                   |             |                   |             |                   |             |                   |
| Inositol, myo                    | 1.00 | $\pm$ 0.11 | <b>0.74</b> | $\pm$ <b>0.03</b> | <b>0.70</b> | $\pm$ <b>0.08</b> | <b>0.65</b> | $\pm$ <b>0.04</b> | 1.08        | $\pm$ 0.09        |
| Phosphoric acid                  | 1.00 | $\pm$ 0.10 | 0.87        | $\pm$ 0.07        | 0.99        | $\pm$ 0.07        | <b>0.55</b> | $\pm$ <b>0.08</b> | 0.97        | $\pm$ 0.03        |
| Putrescine                       | 1.00 | $\pm$ 0.13 | 1.19        | $\pm$ 0.05        | <b>0.66</b> | $\pm$ <b>0.03</b> | <b>0.27</b> | $\pm$ <b>0.04</b> | <b>0.30</b> | $\pm$ <b>0.03</b> |

**Supplemental Table 9.** Comparison of metabolic levels from pericarp tissue of fruits with 65 DAF from wild type, fumarase and malate dehydrogenase antisense plants. Data are normalized to the mean response calculated for the wild type of each measure batch. Values are presented as the mean  $\pm$  SE of 6 biological determinations. The values that are significantly different by t test from the wild type are set in bold type ( $P < 0.05$ ). Red and blue indicate values that are significantly increased or decreased, respectively.

|                                   | WT              |    | F4                                |    | F6                                |    | M14                               |    | M21                               |    |
|-----------------------------------|-----------------|----|-----------------------------------|----|-----------------------------------|----|-----------------------------------|----|-----------------------------------|----|
|                                   | Fold            | SE | Fold                              | SE | Fold                              | SE | Fold                              | SE | Fold                              | SE |
| <b>Amino acids</b>                |                 |    |                                   |    |                                   |    |                                   |    |                                   |    |
| Alanine                           | 1.00 $\pm$ 0.08 |    | <b>0.60 <math>\pm</math> 0.04</b> |    | <b>0.77 <math>\pm</math> 0.06</b> |    | <b>0.23 <math>\pm</math> 0.03</b> |    | 1.00 $\pm$ 0.07                   |    |
| Alanine, beta                     | 1.00 $\pm$ 0.26 |    | 0.97 $\pm$ 0.11                   |    | 0.95 $\pm$ 0.08                   |    | 0.71 $\pm$ 0.09                   |    | 1.01 $\pm$ 0.13                   |    |
| Asparagine                        | 1.00 $\pm$ 0.09 |    | <b>1.48 <math>\pm</math> 0.05</b> |    | <b>1.27 <math>\pm</math> 0.09</b> |    | 0.86 $\pm$ 0.09                   |    | 1.01 $\pm$ 0.18                   |    |
| Aspartate                         | 1.00 $\pm$ 0.07 |    | 0.87 $\pm$ 0.08                   |    | 0.82 $\pm$ 0.06                   |    | 1.10 $\pm$ 0.11                   |    | <b>0.76 <math>\pm</math> 0.10</b> |    |
| GABA                              | 1.00 $\pm$ 0.14 |    | 0.81 $\pm$ 0.09                   |    | 0.72 $\pm$ 0.10                   |    | <b>0.63 <math>\pm</math> 0.07</b> |    | 0.72 $\pm$ 0.07                   |    |
| Glutamate                         | 1.00 $\pm$ 0.09 |    | <b>0.58 <math>\pm</math> 0.04</b> |    | 1.00 $\pm$ 0.05                   |    | <b>0.58 <math>\pm</math> 0.11</b> |    | <b>0.66 <math>\pm</math> 0.09</b> |    |
| Glutamine                         | 1.00 $\pm$ 0.06 |    | <b>2.66 <math>\pm</math> 0.11</b> |    | <b>2.18 <math>\pm</math> 0.32</b> |    | <b>1.33 <math>\pm</math> 0.15</b> |    | <b>1.25 <math>\pm</math> 0.07</b> |    |
| Glycine                           | 1.00 $\pm$ 0.08 |    | <b>1.40 <math>\pm</math> 0.05</b> |    | <b>1.60 <math>\pm</math> 0.25</b> |    | <b>0.54 <math>\pm</math> 0.04</b> |    | <b>1.85 <math>\pm</math> 0.2</b>  |    |
| Histidine                         | 1.00 $\pm$ 0.07 |    | 0.90 $\pm$ 0.11                   |    | 1.10 $\pm$ 0.09                   |    | <b>0.47 <math>\pm</math> 0.07</b> |    | <b>0.71 <math>\pm</math> 0.12</b> |    |
| Isoleucine                        | 1.00 $\pm$ 0.1  |    | <b>1.65 <math>\pm</math> 0.07</b> |    | <b>1.60 <math>\pm</math> 0.11</b> |    | 1.27 $\pm$ 0.13                   |    | <b>1.55 <math>\pm</math> 0.13</b> |    |
| Lysine                            | 1.00 $\pm$ 0.07 |    | 1.10 $\pm$ 0.13                   |    | <b>1.60 <math>\pm</math> 0.08</b> |    | 0.79 $\pm$ 0.09                   |    | 1.28 $\pm$ 0.14                   |    |
| Methionine                        | 1.00 $\pm$ 0.14 |    | 0.69 $\pm$ 0.07                   |    | 1.03 $\pm$ 0.12                   |    | 0.61 $\pm$ 0.13                   |    | 0.67 $\pm$ 0.13                   |    |
| Phenylalanine                     | 1.00 $\pm$ 0.11 |    | 0.8 $\pm$ 0.06                    |    | <b>1.53 <math>\pm</math> 0.19</b> |    | 0.97 $\pm$ 0.15                   |    | 1.07 $\pm$ 0.19                   |    |
| Proline                           | 1.00 $\pm$ 0.17 |    | <b>1.52 <math>\pm</math> 0.06</b> |    | <b>1.57 <math>\pm</math> 0.23</b> |    | 0.96 $\pm$ 0.10                   |    | 0.99 $\pm$ 0.09                   |    |
| Serine                            | 1.00 $\pm$ 0.08 |    | <b>1.54 <math>\pm</math> 0.17</b> |    | <b>1.37 <math>\pm</math> 0.14</b> |    | 1.01 $\pm$ 0.04                   |    | 0.95 $\pm$ 0.18                   |    |
| Threonine                         | 1.00 $\pm$ 0.1  |    | 1.25 $\pm$ 0.12                   |    | 1.2 $\pm$ 0.09                    |    | <b>0.55 <math>\pm</math> 0.03</b> |    | 0.8 $\pm$ 0.11                    |    |
| Tryptophan                        | 1.00 $\pm$ 0.2  |    | 0.71 $\pm$ 0.15                   |    | <b>1.85 <math>\pm</math> 0.25</b> |    | 0.92 $\pm$ 0.12                   |    | 1.34 $\pm$ 0.17                   |    |
| Tyramine                          | 1.00 $\pm$ 0.12 |    | <b>0.57 <math>\pm</math> 0.10</b> |    | 0.93 $\pm$ 0.07                   |    | 0.72 $\pm$ 0.13                   |    | 1.00 $\pm$ 0.09                   |    |
| Valine                            | 1.00 $\pm$ 0.08 |    | 1.17 $\pm$ 0.25                   |    | 1.32 $\pm$ 0.23                   |    | 0.87 $\pm$ 0.12                   |    | <b>1.28 <math>\pm</math> 0.12</b> |    |
| <b>Organic acids</b>              |                 |    |                                   |    |                                   |    |                                   |    |                                   |    |
| Citric acid                       | 1.00 $\pm$ 0.09 |    | 0.8 $\pm$ 0.09                    |    | 0.89 $\pm$ 0.12                   |    | 0.83 $\pm$ 0.07                   |    | <b>1.96 <math>\pm</math> 0.28</b> |    |
| Dehydroascorbic acid              | 1.00 $\pm$ 0.11 |    | <b>1.39 <math>\pm</math> 0.18</b> |    | <b>2.08 <math>\pm</math> 0.07</b> |    | <b>1.59 <math>\pm</math> 0.10</b> |    | <b>1.52 <math>\pm</math> 0.2</b>  |    |
| Fumaric acid                      | 1.00 $\pm$ 0.08 |    | <b>0.58 <math>\pm</math> 0.06</b> |    | <b>0.54 <math>\pm</math> 0.06</b> |    | <b>1.36 <math>\pm</math> 0.06</b> |    | <b>1.40 <math>\pm</math> 0.09</b> |    |
| Galacturonic acid/Glucuronic acid | 1.00 $\pm$ 0.13 |    | 0.98 $\pm$ 0.09                   |    | <b>0.49 <math>\pm</math> 0.07</b> |    | <b>0.61 <math>\pm</math> 0.1</b>  |    | <b>1.45 <math>\pm</math> 0.08</b> |    |
| Malic acid                        | 1.00 $\pm$ 0.05 |    | <b>0.49 <math>\pm</math> 0.06</b> |    | <b>0.67 <math>\pm</math> 0.10</b> |    | <b>1.39 <math>\pm</math> 0.07</b> |    | <b>1.38 <math>\pm</math> 0.07</b> |    |
| Pyroglutamic acid                 | 1.00 $\pm$ 0.08 |    | 0.78 $\pm$ 0.09                   |    | <b>0.74 <math>\pm</math> 0.07</b> |    | <b>0.38 <math>\pm</math> 0.05</b> |    | <b>0.39 <math>\pm</math> 0.03</b> |    |
| Saccharic acid                    | 1.00 $\pm$ 0.19 |    | 1.32 $\pm$ 0.24                   |    | 1.05 $\pm$ 0.09                   |    | <b>1.81 <math>\pm</math> 0.27</b> |    | 1.32 $\pm$ 0.15                   |    |
| Succinic acid                     | 1.00 $\pm$ 0.16 |    | 0.62 $\pm$ 0.14                   |    | 0.66 $\pm$ 0.12                   |    | 0.96 $\pm$ 0.04                   |    | 0.82 $\pm$ 0.1                    |    |
| <b>Sugars and Sugars alcohol</b>  |                 |    |                                   |    |                                   |    |                                   |    |                                   |    |
| Fructose                          | 1.00 $\pm$ 0.07 |    | <b>0.69 <math>\pm</math> 0.01</b> |    | <b>0.52 <math>\pm</math> 0.06</b> |    | <b>0.57 <math>\pm</math> 0.01</b> |    | <b>0.70 <math>\pm</math> 0.07</b> |    |
| Fucose                            | 1.00 $\pm$ 0.1  |    | 1.03 $\pm$ 0.04                   |    | 1.14 $\pm$ 0.13                   |    | 0.99 $\pm$ 0.10                   |    | 1.11 $\pm$ 0.03                   |    |
| Galactinol                        | 1.00 $\pm$ 0.18 |    | 0.93 $\pm$ 0.23                   |    | 0.88 $\pm$ 0.13                   |    | 1.12 $\pm$ 0.14                   |    | 1.03 $\pm$ 0.14                   |    |
| Glucose                           | 1.00 $\pm$ 0.05 |    | <b>0.66 <math>\pm</math> 0.02</b> |    | <b>0.60 <math>\pm</math> 0.08</b> |    | <b>0.69 <math>\pm</math> 0.06</b> |    | <b>0.78 <math>\pm</math> 0.03</b> |    |
| Maltose                           | 1.00 $\pm$ 0.14 |    | 1.23 $\pm$ 0.38                   |    | <b>2.25 <math>\pm</math> 0.55</b> |    | 1.54 $\pm$ 0.35                   |    | <b>1.80 <math>\pm</math> 0.33</b> |    |
| Rhamnose                          | 1.00 $\pm$ 0.09 |    | 1.01 $\pm$ 0.14                   |    | 1.14 $\pm$ 0.22                   |    | 0.96 $\pm$ 0.15                   |    | 1.06 $\pm$ 0.15                   |    |
| Sucrose                           | 1.00 $\pm$ 0.11 |    | 1.12 $\pm$ 0.17                   |    | <b>1.99 <math>\pm</math> 0.20</b> |    | 0.96 $\pm$ 0.11                   |    | 1.07 $\pm$ 0.11                   |    |
| Xylose                            | 1.00 $\pm$ 0.1  |    | 1.20 $\pm$ 0.09                   |    | 1.29 $\pm$ 0.2                    |    | 1.12 $\pm$ 0.05                   |    | 1.32 $\pm$ 0.16                   |    |
| <b>Miscellaneous</b>              |                 |    |                                   |    |                                   |    |                                   |    |                                   |    |
| Inositol, myo                     | 1.00 $\pm$ 0.08 |    | 0.95 $\pm$ 0.08                   |    | 1.08 $\pm$ 0.12                   |    | 0.84 $\pm$ 0.08                   |    | 0.9 $\pm$ 0.08                    |    |
| Phosphoric acid                   | 1.00 $\pm$ 0.02 |    | 0.97 $\pm$ 0.07                   |    | 1.09 $\pm$ 0.08                   |    | <b>0.72 <math>\pm</math> 0.08</b> |    | 1.05 $\pm$ 0.11                   |    |
| Putrescine                        | 1.00 $\pm$ 0.13 |    | <b>1.86 <math>\pm</math> 0.24</b> |    | <b>2.36 <math>\pm</math> 0.18</b> |    | <b>0.45 <math>\pm</math> 0.02</b> |    | <b>0.59 <math>\pm</math> 0.14</b> |    |

**Supplemental Table 10.** Comparison of metabolic levels from columbina tissue of fruits with 65 DAF from wild type, fumarase and malate dehydrogenase antisense plants. Data are normalized to the mean response calculated for the wild type of each measure batch. Values are presented as the mean  $\pm$  SE of 6 biological determinations. The values that are significantly different by t test from the wild type are set in bold type ( $P < 0.05$ ). Red and blue indicate values that are significantly increased or decreased, respectively.

|                                  | WT   |            | F4          |                   | F6          |                   | M14         |                   | M21         |                   |
|----------------------------------|------|------------|-------------|-------------------|-------------|-------------------|-------------|-------------------|-------------|-------------------|
|                                  | Fold | SE         | Fold        | SE                | Fold        | SE                | Fold        | SE                | Fold        | SE                |
| <b>Amino acids</b>               |      |            |             |                   |             |                   |             |                   |             |                   |
| Alanine                          | 1.00 | $\pm$ 0.08 | 1.08        | $\pm$ 0.21        | <b>0.76</b> | $\pm$ <b>0.09</b> | <b>0.72</b> | $\pm$ <b>0.08</b> | 0.88        | $\pm$ 0.01        |
| Alanine, beta                    | 1.00 | $\pm$ 0.09 | 0.92        | $\pm$ 0.05        | <b>0.45</b> | $\pm$ <b>0.05</b> | <b>0.71</b> | $\pm$ <b>0.09</b> | <b>0.56</b> | $\pm$ <b>0.04</b> |
| Asparagine                       | 1.00 | $\pm$ 0.24 | <b>1.72</b> | $\pm$ <b>0.13</b> | 0.65        | $\pm$ 0.07        | 1.85        | $\pm$ 0.4         | 1.00        | $\pm$ 0.03        |
| Aspartate                        | 1.00 | $\pm$ 0.06 | 0.98        | $\pm$ 0.07        | <b>0.51</b> | $\pm$ <b>0.07</b> | <b>0.67</b> | $\pm$ <b>0.05</b> | 1.09        | $\pm$ 0.05        |
| GABA                             | 1.00 | $\pm$ 0.04 | <b>1.77</b> | $\pm$ <b>0.15</b> | <b>1.90</b> | $\pm$ <b>0.32</b> | 1.20        | $\pm$ 0.11        | <b>2.12</b> | $\pm$ <b>0.19</b> |
| Glutamate                        | 1.00 | $\pm$ 0.14 | 0.98        | $\pm$ 0.09        | <b>0.22</b> | $\pm$ <b>0.05</b> | 1.05        | $\pm$ 0.11        | 0.85        | $\pm$ 0.12        |
| Glutamine                        | 1.00 | $\pm$ 0.10 | <b>2.92</b> | $\pm$ <b>0.47</b> | <b>0.64</b> | $\pm$ <b>0.08</b> | 1.09        | $\pm$ 0.05        | <b>1.39</b> | $\pm$ <b>0.14</b> |
| Glycine                          | 1.00 | $\pm$ 0.09 | <b>1.37</b> | $\pm$ <b>0.05</b> | 0.95        | $\pm$ 0.07        | 1.03        | $\pm$ 0.08        | 1.02        | $\pm$ 0.13        |
| Histidine                        | 1.00 | $\pm$ 0.14 | <b>1.39</b> | $\pm$ <b>0.11</b> | <b>0.52</b> | $\pm$ <b>0.05</b> | <b>1.70</b> | $\pm$ <b>0.04</b> | 1.06        | $\pm$ 0.03        |
| Isoleucine                       | 1.00 | $\pm$ 0.21 | 1.18        | $\pm$ 0.15        | 0.67        | $\pm$ 0.14        | 1.26        | $\pm$ 0.11        | 0.81        | $\pm$ 0.01        |
| Lysine                           | 1.00 | $\pm$ 0.16 | 1.37        | $\pm$ 0.16        | <b>0.55</b> | $\pm$ <b>0.07</b> | <b>1.50</b> | $\pm$ <b>0.11</b> | 1.5         | $\pm$ 0.23        |
| Methionine                       | 1.00 | $\pm$ 0.2  | 1.11        | $\pm$ 0.2         | <b>0.51</b> | $\pm$ <b>0.10</b> | 0.70        | $\pm$ 0.15        | 1.27        | $\pm$ 0.29        |
| Phenylalanine                    | 1.00 | $\pm$ 0.15 | 0.94        | $\pm$ 0.06        | <b>0.49</b> | $\pm$ <b>0.05</b> | 1.27        | $\pm$ 0.24        | 0.76        | $\pm$ 0.10        |
| Proline                          | 1.00 | $\pm$ 0.12 | 0.75        | $\pm$ 0.05        | <b>0.65</b> | $\pm$ <b>0.09</b> | 0.94        | $\pm$ 0.09        | 0.98        | $\pm$ 0.08        |
| Serine                           | 1.00 | $\pm$ 0.11 | 0.88        | $\pm$ 0.04        | <b>0.45</b> | $\pm$ <b>0.08</b> | 1.08        | $\pm$ 0.14        | 0.99        | $\pm$ 0.08        |
| Threonine                        | 1.00 | $\pm$ 0.11 | 1.22        | $\pm$ 0.23        | 0.80        | $\pm$ 0.14        | 0.87        | $\pm$ 0.14        | 1.05        | $\pm$ 0.01        |
| Tryptophan                       | 1.00 | $\pm$ 0.17 | 1.2         | $\pm$ 0.10        | 0.75        | $\pm$ 0.11        | 0.96        | $\pm$ 0.08        | <b>2.12</b> | $\pm$ <b>0.27</b> |
| Tyramine                         | 1.00 | $\pm$ 0.22 | 0.96        | $\pm$ 0.11        | 1.41        | $\pm$ 0.2         | 1.55        | $\pm$ 0.19        | 1.34        | $\pm$ 0.13        |
| Valine                           | 1.00 | $\pm$ 0.07 | <b>0.71</b> | $\pm$ <b>0.04</b> | <b>0.57</b> | $\pm$ <b>0.06</b> | 0.97        | $\pm$ 0.12        | <b>0.77</b> | $\pm$ <b>0.07</b> |
| <b>Organic acids</b>             |      |            |             |                   |             |                   |             |                   |             |                   |
| Citric acid                      | 1.00 | $\pm$ 0.09 | 0.97        | $\pm$ 0.09        | <b>0.35</b> | $\pm$ <b>0.04</b> | <b>0.38</b> | $\pm$ <b>0.02</b> | <b>0.37</b> | $\pm$ <b>0.04</b> |
| Dehydroascorbic acid             | 1.00 | $\pm$ 0.08 | <b>0.58</b> | $\pm$ <b>0.08</b> | <b>0.75</b> | $\pm$ <b>0.05</b> | <b>0.78</b> | $\pm$ <b>0.05</b> | 0.88        | $\pm$ 0.15        |
| Fumaric acid                     | 1.00 | $\pm$ 0.13 | <b>0.52</b> | $\pm$ <b>0.01</b> | <b>0.63</b> | $\pm$ <b>0.07</b> | <b>1.41</b> | $\pm$ <b>0.10</b> | 1.33        | $\pm$ 0.12        |
| Galacturonic acid/Glucuroni      | 1.00 | $\pm$ 0.12 | 0.97        | $\pm$ 0.09        | 0.99        | $\pm$ 0.08        | 0.99        | $\pm$ 0.13        | 1.33        | $\pm$ 0.14        |
| Malic acid                       | 1.00 | $\pm$ 0.07 | <b>0.52</b> | $\pm$ <b>0.04</b> | <b>0.51</b> | $\pm$ <b>0.03</b> | 0.81        | $\pm$ 0.09        | <b>0.80</b> | $\pm$ <b>0.03</b> |
| Pyroglutamic acid                | 1.00 | $\pm$ 0.09 | <b>1.91</b> | $\pm$ <b>0.14</b> | 0.93        | $\pm$ 0.36        | <b>1.79</b> | $\pm$ <b>0.15</b> | <b>2.08</b> | $\pm$ <b>0.3</b>  |
| Saccharic acid                   | 1.00 | $\pm$ 0.09 | 0.99        | $\pm$ 0.14        | <b>0.63</b> | $\pm$ <b>0.10</b> | <b>1.87</b> | $\pm$ <b>0.22</b> | 1.30        | $\pm$ 0.16        |
| Succinic acid                    | 1.00 | $\pm$ 0.14 | 1.09        | $\pm$ 0.27        | 1.01        | $\pm$ 0.09        | 1.22        | $\pm$ 0.18        | 1.19        | $\pm$ 0.14        |
| <b>Sugars and Sugars alcohol</b> |      |            |             |                   |             |                   |             |                   |             |                   |
| Fructose                         | 1.00 | $\pm$ 0.04 | <b>0.73</b> | $\pm$ <b>0.07</b> | <b>0.72</b> | $\pm$ <b>0.06</b> | <b>0.75</b> | $\pm$ <b>0.06</b> | <b>0.73</b> | $\pm$ <b>0.02</b> |
| Fucose                           | 1.00 | $\pm$ 0.15 | 1.07        | $\pm$ 0.05        | 0.97        | $\pm$ 0.07        | 1.18        | $\pm$ 0.10        | 0.86        | $\pm$ 0.04        |
| Galactinol                       | 1.00 | $\pm$ 0.21 | 1.03        | $\pm$ 0.18        | 0.66        | $\pm$ 0.08        | 1.3         | $\pm$ 0.19        | 0.91        | $\pm$ 0.11        |
| Glucose                          | 1.00 | $\pm$ 0.07 | <b>0.69</b> | $\pm$ <b>0.09</b> | <b>0.69</b> | $\pm$ <b>0.05</b> | <b>0.70</b> | $\pm$ <b>0.05</b> | <b>0.78</b> | $\pm$ <b>0.02</b> |
| Maltose                          | 1.00 | $\pm$ 0.12 | <b>3.75</b> | $\pm$ <b>1.01</b> | <b>2.95</b> | $\pm$ <b>0.64</b> | 0.99        | $\pm$ 0.21        | <b>2.79</b> | $\pm$ <b>0.44</b> |
| Rhamnose                         | 1.00 | $\pm$ 0.12 | 1.11        | $\pm$ 0.06        | 1.12        | $\pm$ 0.2         | 1.08        | $\pm$ 0.13        | 0.85        | $\pm$ 0.03        |
| Sucrose                          | 1.00 | $\pm$ 0.11 | 0.97        | $\pm$ 0.08        | 1.13        | $\pm$ 0.04        | <b>1.52</b> | $\pm$ <b>0.26</b> | 1.22        | $\pm$ 0.07        |
| Xylose                           | 1.00 | $\pm$ 0.14 | 1.15        | $\pm$ 0.03        | 1.14        | $\pm$ 0.18        | 1.2         | $\pm$ 0.14        | 0.99        | $\pm$ 0.13        |
| <b>Miscellaneous</b>             |      |            |             |                   |             |                   |             |                   |             |                   |
| Inositol, myo                    | 1.00 | $\pm$ 0.12 | <b>0.63</b> | $\pm$ <b>0.13</b> | <b>0.68</b> | $\pm$ <b>0.08</b> | 0.81        | $\pm$ 0.12        | <b>1.41</b> | $\pm$ <b>0.12</b> |
| Phosphoric acid                  | 1.00 | $\pm$ 0.14 | 0.78        | $\pm$ 0.11        | <b>1.53</b> | $\pm$ <b>0.16</b> | 1.38        | $\pm$ 0.25        | <b>2.91</b> | $\pm$ <b>0.39</b> |
| Putrescine                       | 1.00 | $\pm$ 0.14 | 1.25        | $\pm$ 0.17        | 1.12        | $\pm$ 0.14        | 0.93        | $\pm$ 0.23        | 1.03        | $\pm$ 0.07        |



**Supplemental Table 11.** Comparison of metabolic levels from medula tissue of fruits with 65 DAF from wild type, fumarase and malate dehydrogenase antisense plants. Data are normalized to the mean response calculated for the wild type of each measure batch. Values are presented as the mean  $\pm$  SE of 6 biological determinations. The values that are significantly different by t test from the wild type are set in bold type ( $P < 0.05$ ). Red and blue indicate values that are significantly increased or decreased, respectively.

|                                   | WT              |                                   | F4                                |                                   | F6                                |    | M14  |    | M21  |    |
|-----------------------------------|-----------------|-----------------------------------|-----------------------------------|-----------------------------------|-----------------------------------|----|------|----|------|----|
|                                   | Fold            | SE                                | Fold                              | SE                                | Fold                              | SE | Fold | SE | Fold | SE |
| <b>Amino acids</b>                |                 |                                   |                                   |                                   |                                   |    |      |    |      |    |
| Alanine                           | 1.00 $\pm$ 0.16 | 1.23 $\pm$ 0.21                   | 0.88 $\pm$ 0.18                   | 1.08 $\pm$ 0.03                   | 1.08 $\pm$ 0.21                   |    |      |    |      |    |
| Alanine, beta                     | 1.00 $\pm$ 0.22 | 0.92 $\pm$ 0.22                   | 0.97 $\pm$ 0.04                   | 0.76 $\pm$ 0.14                   | 1.49 $\pm$ 0.18                   |    |      |    |      |    |
| Asparagine                        | 1.00 $\pm$ 0.17 | <b>0.58 <math>\pm</math> 0.12</b> | <b>0.42 <math>\pm</math> 0.06</b> | <b>0.52 <math>\pm</math> 0.02</b> | <b>0.50 <math>\pm</math> 0.03</b> |    |      |    |      |    |
| Aspartate                         | 1.00 $\pm$ 0.09 | <b>0.47 <math>\pm</math> 0.03</b> | <b>0.29 <math>\pm</math> 0.03</b> | <b>0.51 <math>\pm</math> 0.04</b> | 1.07 $\pm$ 0.06                   |    |      |    |      |    |
| GABA                              | 1.00 $\pm$ 0.04 | <b>2.08 <math>\pm</math> 0.07</b> | <b>1.99 <math>\pm</math> 0.04</b> | <b>1.77 <math>\pm</math> 0.20</b> | <b>1.81 <math>\pm</math> 0.13</b> |    |      |    |      |    |
| Glutamate                         | 1.00 $\pm$ 0.16 | 0.69 $\pm$ 0.06                   | <b>0.59 <math>\pm</math> 0.04</b> | 0.78 $\pm$ 0.17                   | 0.68 $\pm$ 0.1                    |    |      |    |      |    |
| Glutamine                         | 1.00 $\pm$ 0.12 | 1.20 $\pm$ 0.15                   | 1.03 $\pm$ 0.12                   | 1.35 $\pm$ 0.18                   | 0.9 $\pm$ 0.21                    |    |      |    |      |    |
| Glycine                           | 1.00 $\pm$ 0.16 | 1.28 $\pm$ 0.21                   | 1.15 $\pm$ 0.1                    | 0.99 $\pm$ 0.06                   | 1.23 $\pm$ 0.13                   |    |      |    |      |    |
| Histidine                         | 1.00 $\pm$ 0.05 | <b>0.58 <math>\pm</math> 0.08</b> | <b>0.53 <math>\pm</math> 0.01</b> | <b>0.49 <math>\pm</math> 0.02</b> | 1.20 $\pm$ 0.13                   |    |      |    |      |    |
| Isoleucine                        | 1.00 $\pm$ 0.09 | 1.08 $\pm$ 0.06                   | 1.02 $\pm$ 0.13                   | <b>0.51 <math>\pm</math> 0.06</b> | <b>1.34 <math>\pm</math> 0.05</b> |    |      |    |      |    |
| Lysine                            | 1.00 $\pm$ 0.09 | 1.2 $\pm$ 0.09                    | <b>0.79 <math>\pm</math> 0.04</b> | <b>0.62 <math>\pm</math> 0.10</b> | 1.01 $\pm$ 0.15                   |    |      |    |      |    |
| Methionine                        | 1.00 $\pm$ 0.17 | <b>0.57 <math>\pm</math> 0.09</b> | <b>0.60 <math>\pm</math> 0.07</b> | 0.60 $\pm$ 0.09                   | 1.02 $\pm$ 0.1                    |    |      |    |      |    |
| Phenylalanine                     | 1.00 $\pm$ 0.04 | 0.99 $\pm$ 0.10                   | <b>1.68 <math>\pm</math> 0.12</b> | <b>0.50 <math>\pm</math> 0.06</b> | <b>0.64 <math>\pm</math> 0.03</b> |    |      |    |      |    |
| Proline                           | 1.00 $\pm$ 0.12 | 1.13 $\pm$ 0.17                   | <b>0.73 <math>\pm</math> 0.06</b> | 0.73 $\pm$ 0.09                   | 0.94 $\pm$ 0.11                   |    |      |    |      |    |
| Serine                            | 1.00 $\pm$ 0.12 | 1.02 $\pm$ 0.24                   | 0.83 $\pm$ 0.11                   | 1.06 $\pm$ 0.02                   | 0.93 $\pm$ 0.1                    |    |      |    |      |    |
| Threonine                         | 1.00 $\pm$ 0.14 | 1.25 $\pm$ 0.30                   | 1.09 $\pm$ 0.11                   | 0.87 $\pm$ 0.05                   | <b>1.31 <math>\pm</math> 0.05</b> |    |      |    |      |    |
| Tryptophan                        | 1.00 $\pm$ 0.18 | 0.62 $\pm$ 0.06                   | 0.89 $\pm$ 0.16                   | 1.38 $\pm$ 0.17                   | 0.93 $\pm$ 0.17                   |    |      |    |      |    |
| Tyramine                          | 1.00 $\pm$ 0.09 | 0.8 $\pm$ 0.13                    | 0.92 $\pm$ 0.18                   | 0.99 $\pm$ 0.15                   | 0.97 $\pm$ 0.12                   |    |      |    |      |    |
| Valine                            | 1.00 $\pm$ 0.11 | 1.24 $\pm$ 0.20                   | 0.97 $\pm$ 0.09                   | 1.19 $\pm$ 0.14                   | 0.98 $\pm$ 0.16                   |    |      |    |      |    |
| <b>Organic acids</b>              |                 |                                   |                                   |                                   |                                   |    |      |    |      |    |
| Citric acid                       | 1.00 $\pm$ 0.11 | 1.07 $\pm$ 0.12                   | 0.76 $\pm$ 0.08                   | <b>0.53 <math>\pm</math> 0.09</b> | 0.99 $\pm$ 0.15                   |    |      |    |      |    |
| Dehydroascorbic acid              | 1.00 $\pm$ 0.12 | 0.88 $\pm$ 0.08                   | 1.13 $\pm$ 0.27                   | 1.23 $\pm$ 0.22                   | 1.06 $\pm$ 0.19                   |    |      |    |      |    |
| Fumaric acid                      | 1.00 $\pm$ 0.09 | 1.21 $\pm$ 0.23                   | 0.98 $\pm$ 0.1                    | <b>1.57 <math>\pm</math> 0.28</b> | 1.16 $\pm$ 0.16                   |    |      |    |      |    |
| Galacturonic acid/Glucuronic acid | 1.00 $\pm$ 0.05 | <b>0.84 <math>\pm</math> 0.02</b> | <b>0.53 <math>\pm</math> 0.09</b> | <b>0.63 <math>\pm</math> 0.09</b> | <b>1.20 <math>\pm</math> 0.05</b> |    |      |    |      |    |
| Malic acid                        | 1.00 $\pm$ 0.11 | <b>0.46 <math>\pm</math> 0.05</b> | <b>0.53 <math>\pm</math> 0.06</b> | 0.93 $\pm$ 0.03                   | 1.12 $\pm$ 0.08                   |    |      |    |      |    |
| Pyroglutamic acid                 | 1.00 $\pm$ 0.06 | <b>0.62 <math>\pm</math> 0.07</b> | <b>0.48 <math>\pm</math> 0.05</b> | <b>0.52 <math>\pm</math> 0.05</b> | <b>0.37 <math>\pm</math> 0.06</b> |    |      |    |      |    |
| Saccharic acid                    | 1.00 $\pm$ 0.12 | <b>0.39 <math>\pm</math> 0.04</b> | <b>0.40 <math>\pm</math> 0.05</b> | 0.92 $\pm$ 0.1                    | <b>0.44 <math>\pm</math> 0.03</b> |    |      |    |      |    |
| Succinic acid                     | 1.00 $\pm$ 0.03 | 0.89 $\pm$ 0.09                   | <b>0.88 <math>\pm</math> 0.05</b> | 0.91 $\pm$ 0.09                   | 0.99 $\pm$ 0.07                   |    |      |    |      |    |
| <b>Sugars and Sugars alcohol</b>  |                 |                                   |                                   |                                   |                                   |    |      |    |      |    |
| Fructose                          | 1.00 $\pm$ 0.09 | <b>0.63 <math>\pm</math> 0.05</b> | <b>0.77 <math>\pm</math> 0.06</b> | 0.82 $\pm$ 0.04                   | 0.87 $\pm$ 0.03                   |    |      |    |      |    |
| Fucose                            | 1.00 $\pm$ 0.11 | 1.1 $\pm$ 0.06                    | 1.03 $\pm$ 0.1                    | 1.17 $\pm$ 0.13                   | 0.97 $\pm$ 0.07                   |    |      |    |      |    |
| Galactinol                        | 1.00 $\pm$ 0.16 | 0.94 $\pm$ 0.14                   | 0.7 $\pm$ 0.11                    | 1.11 $\pm$ 0.2                    | <b>1.50 <math>\pm</math> 0.18</b> |    |      |    |      |    |
| Glucose                           | 1.00 $\pm$ 0.10 | <b>0.71 <math>\pm</math> 0.08</b> | <b>0.68 <math>\pm</math> 0.01</b> | <b>0.71 <math>\pm</math> 0.04</b> | 0.81 $\pm$ 0.02                   |    |      |    |      |    |
| Maltose                           | 1.00 $\pm$ 0.31 | 3.18 $\pm$ 2.24                   | <b>6.10 <math>\pm</math> 0.32</b> | 1.8 $\pm$ 0.24                    | 0.77 $\pm$ 0.06                   |    |      |    |      |    |
| Rhamnose                          | 1.00 $\pm$ 0.16 | 1.07 $\pm$ 0.06                   | 1.13 $\pm$ 0.22                   | 1.23 $\pm$ 0.14                   | 0.87 $\pm$ 0.08                   |    |      |    |      |    |
| Sucrose                           | 1.00 $\pm$ 0.11 | 1.19 $\pm$ 0.09                   | 1.2 $\pm$ 0.06                    | 1.05 $\pm$ 0.12                   | 1.11 $\pm$ 0.11                   |    |      |    |      |    |
| Xylose                            | 1.00 $\pm$ 0.1  | 1.11 $\pm$ 0.06                   | 1.1 $\pm$ 0.1                     | 1.21 $\pm$ 0.07                   | 1.06 $\pm$ 0.14                   |    |      |    |      |    |
| <b>Miscellaneous</b>              |                 |                                   |                                   |                                   |                                   |    |      |    |      |    |
| Inositol, myo                     | 1.00 $\pm$ 0.08 | 1.01 $\pm$ 0.15                   | <b>0.76 <math>\pm</math> 0.05</b> | 1.09 $\pm$ 0.16                   | <b>1.31 <math>\pm</math> 0.14</b> |    |      |    |      |    |
| Phosphoric acid                   | 1.00 $\pm$ 0.15 | <b>0.66 <math>\pm</math> 0.02</b> | <b>0.62 <math>\pm</math> 0.03</b> | 0.42 $\pm$ 0.03                   | 1.75 $\pm$ 0.13                   |    |      |    |      |    |
| Putrescine                        | 1.00 $\pm$ 0.12 | <b>1.76 <math>\pm</math> 0.14</b> | <b>1.97 <math>\pm</math> 0.40</b> | 0.77 $\pm$ 0.27                   | 1.04 $\pm$ 0.12                   |    |      |    |      |    |



**Supplemental Table 12.** Comparison of metabolic levels from locula tissue of fruits with 65 DAF from wild type, fumarase and malate dehydrogenase antisense plants. Data are normalized to the mean response calculated for the wild type of each measure batch. Values are presented as the mean  $\pm$  SE of 6 biological determinations. The values that are significantly different by t test from the wild type are set in bold type ( $P < 0.05$ ). Red and blue indicate values that are significantly increased or decreased, respectively.

|                                   | WT   |            | F4          |                   | F6          |                   | M14         |                   | M21         |                   |
|-----------------------------------|------|------------|-------------|-------------------|-------------|-------------------|-------------|-------------------|-------------|-------------------|
|                                   | Fold | SE         | Fold        | SE                | Fold        | SE                | Fold        | SE                | Fold        | SE                |
| <b>Amino acids</b>                |      |            |             |                   |             |                   |             |                   |             |                   |
| Alanine                           | 1.00 | $\pm$ 0.08 | 1.25        | $\pm$ 0.12        | <b>1.36</b> | $\pm$ <b>0.13</b> | 1.10        | $\pm$ 0.05        | <b>1.60</b> | $\pm$ <b>0.10</b> |
| Alanine, beta                     | 1.00 | $\pm$ 0.14 | 1.41        | $\pm$ 0.25        | 1.10        | $\pm$ 0.12        | 0.75        | $\pm$ 0.18        | <b>0.70</b> | $\pm$ <b>0.05</b> |
| Asparagine                        | 1.00 | $\pm$ 0.04 | <b>0.64</b> | $\pm$ <b>0.11</b> | <b>0.67</b> | $\pm$ <b>0.06</b> | 0.84        | $\pm$ 0.10        | <b>0.44</b> | $\pm$ <b>0.06</b> |
| Aspartate                         | 1.00 | $\pm$ 0.11 | <b>0.43</b> | $\pm$ <b>0.02</b> | 0.72        | $\pm$ 0.13        | 0.89        | $\pm$ 0.02        | <b>0.51</b> | $\pm$ <b>0.08</b> |
| GABA                              | 1.00 | $\pm$ 0.13 | <b>1.59</b> | $\pm$ <b>0.13</b> | 1.17        | $\pm$ 0.13        | 0.86        | $\pm$ 0.06        | <b>0.57</b> | $\pm$ <b>0.06</b> |
| Glutamate                         | 1.00 | $\pm$ 0.04 | <b>0.36</b> | $\pm$ <b>0.03</b> | <b>0.41</b> | $\pm$ <b>0.03</b> | 1.02        | $\pm$ 0.11        | <b>0.74</b> | $\pm$ <b>0.11</b> |
| Glutamine                         | 1.00 | $\pm$ 0.07 | 1.00        | $\pm$ 0.17        | 0.85        | $\pm$ 0.07        | 0.89        | $\pm$ 0.13        | <b>0.33</b> | $\pm$ <b>0.04</b> |
| Glycine                           | 1.00 | $\pm$ 0.10 | 0.95        | $\pm$ 0.2         | 1.13        | $\pm$ 0.1         | 0.76        | $\pm$ 0.02        | 0.88        | $\pm$ 0.13        |
| Histidine                         | 1.00 | $\pm$ 0.12 | 0.72        | $\pm$ 0.09        | 1.07        | $\pm$ 0.07        | 0.7         | $\pm$ 0.06        | <b>0.58</b> | $\pm$ <b>0.04</b> |
| Isoleucine                        | 1.00 | $\pm$ 0.10 | 1.06        | $\pm$ 0.08        | 1.11        | $\pm$ 0.12        | <b>0.67</b> | $\pm$ <b>0.02</b> | <b>0.53</b> | $\pm$ <b>0.04</b> |
| Lysine                            | 1.00 | $\pm$ 0.14 | 0.77        | $\pm$ 0.13        | 0.8         | $\pm$ 0.08        | 0.64        | $\pm$ 0.11        | 0.73        | $\pm$ 0.13        |
| Methionine                        | 1.00 | $\pm$ 0.07 | <b>0.57</b> | $\pm$ <b>0.05</b> | 0.85        | $\pm$ 0.03        | <b>0.54</b> | $\pm$ <b>0.05</b> | <b>0.53</b> | $\pm$ <b>0.07</b> |
| Phenylalanine                     | 1.00 | $\pm$ 0.10 | 0.91        | $\pm$ 0.07        | 1.03        | $\pm$ 0.17        | 0.75        | $\pm$ 0.05        | <b>0.43</b> | $\pm$ <b>0.05</b> |
| Proline                           | 1.00 | $\pm$ 0.15 | 0.83        | $\pm$ 0.12        | 1.19        | $\pm$ 0.05        | 0.61        | $\pm$ 0.06        | 1.15        | $\pm$ 0.13        |
| Serine                            | 1.00 | $\pm$ 0.16 | <b>0.39</b> | $\pm$ <b>0.04</b> | 0.92        | $\pm$ 0.07        | <b>0.59</b> | $\pm$ <b>0.01</b> | <b>0.31</b> | $\pm$ <b>0.04</b> |
| Threonine                         | 1.00 | $\pm$ 0.14 | 0.63        | $\pm$ 0.14        | 1.11        | $\pm$ 0.08        | 0.75        | $\pm$ 0.07        | <b>0.43</b> | $\pm$ <b>0.05</b> |
| Tryptophan                        | 1.00 | $\pm$ 0.12 | 0.90        | $\pm$ 0.22        | 1.19        | $\pm$ 0.18        | <b>0.61</b> | $\pm$ <b>0.04</b> | 0.80        | $\pm$ 0.08        |
| Tyramine                          | 1.00 | $\pm$ 0.31 | 1.08        | $\pm$ 0.12        | 1.02        | $\pm$ 0.15        | 0.72        | $\pm$ 0.09        | 0.68        | $\pm$ 0.15        |
| Valine                            | 1.00 | $\pm$ 0.10 | <b>0.65</b> | $\pm$ <b>0.05</b> | 1.14        | $\pm$ 0.13        | 1.33        | $\pm$ 0.18        | 1.25        | $\pm$ 0.14        |
| <b>Organic acids</b>              |      |            |             |                   |             |                   |             |                   |             |                   |
| Citric acid                       | 1.00 | $\pm$ 0.11 | 1.01        | $\pm$ 0.13        | 0.85        | $\pm$ 0.07        | <b>0.62</b> | $\pm$ <b>0.03</b> | 1.00        | $\pm$ 0.05        |
| Dehydroascorbic acid              | 1.00 | $\pm$ 0.06 | 0.88        | $\pm$ 0.08        | 0.85        | $\pm$ 0.12        | 1.02        | $\pm$ 0.02        | 1.01        | $\pm$ 0.09        |
| Fumaric acid                      | 1.00 | $\pm$ 0.16 | 1.23        | $\pm$ 0.16        | 1.00        | $\pm$ 0.05        | 0.93        | $\pm$ 0.07        | 1.21        | $\pm$ 0.17        |
| Galacturonic acid/Glucuronic acid | 1.00 | $\pm$ 0.19 | 0.93        | $\pm$ 0.12        | 0.63        | $\pm$ 0.08        | 0.92        | $\pm$ 0.07        | <b>1.54</b> | $\pm$ <b>0.12</b> |
| Malic acid                        | 1.00 | $\pm$ 0.06 | <b>0.85</b> | $\pm$ <b>0.03</b> | <b>0.65</b> | $\pm$ <b>0.07</b> | 1.12        | $\pm$ 0.07        | <b>1.23</b> | $\pm$ <b>0.03</b> |
| Pyroglutamic acid                 | 1.00 | $\pm$ 0.15 | <b>0.53</b> | $\pm$ <b>0.06</b> | <b>0.50</b> | $\pm$ <b>0.02</b> | 0.74        | $\pm$ 0.04        | <b>0.29</b> | $\pm$ <b>0.04</b> |
| Saccharic acid                    | 1.00 | $\pm$ 0.19 | 1.53        | $\pm$ 0.44        | 1.16        | $\pm$ 0.08        | <b>3.01</b> | $\pm$ <b>0.37</b> | <b>1.55</b> | $\pm$ <b>0.15</b> |
| Succinic acid                     | 1.00 | $\pm$ 0.12 | 1.06        | $\pm$ 0.02        | 0.97        | $\pm$ 0.1         | 0.87        | $\pm$ 0.14        | 1.24        | $\pm$ 0.18        |
| <b>Sugars and Sugars alcohol</b>  |      |            |             |                   |             |                   |             |                   |             |                   |
| Fructose                          | 1.00 | $\pm$ 0.10 | 1.08        | $\pm$ 0.07        | 1.02        | $\pm$ 0.1         | 1.03        | $\pm$ 0.04        | 1.12        | $\pm$ 0.05        |
| Fucose                            | 1.00 | $\pm$ 0.06 | 1.09        | $\pm$ 0.09        | 1.01        | $\pm$ 0.07        | 1.01        | $\pm$ 0.05        | 1.03        | $\pm$ 0.12        |
| Galactinol                        | 1.00 | $\pm$ 0.13 | 1.04        | $\pm$ 0.12        | <b>0.62</b> | $\pm$ <b>0.06</b> | 1.02        | $\pm$ 0.08        | 1.15        | $\pm$ 0.04        |
| Glucose                           | 1.00 | $\pm$ 0.03 | <b>0.83</b> | $\pm$ <b>0.05</b> | <b>1.14</b> | $\pm$ <b>0.05</b> | <b>1.28</b> | $\pm$ <b>0.07</b> | <b>1.31</b> | $\pm$ <b>0.08</b> |
| Maltose                           | 1.00 | $\pm$ 0.14 | <b>1.65</b> | $\pm$ <b>0.33</b> | <b>3.49</b> | $\pm$ <b>0.11</b> | 0.67        | $\pm$ 0.07        | 0.89        | $\pm$ 0.17        |
| Rhamnose                          | 1.00 | $\pm$ 0.05 | 1.12        | $\pm$ 0.20        | 1.07        | $\pm$ 0.13        | 1.09        | $\pm$ 0.09        | 1.00        | $\pm$ 0.13        |
| Sucrose                           | 1.00 | $\pm$ 0.07 | 1.07        | $\pm$ 0.11        | <b>1.64</b> | $\pm$ <b>0.12</b> | 1.27        | $\pm$ 0.15        | <b>1.50</b> | $\pm$ <b>0.13</b> |
| Xylose                            | 1.00 | $\pm$ 0.04 | 1.12        | $\pm$ 0.07        | 1.07        | $\pm$ 0.10        | 1.11        | $\pm$ 0.05        | 1.17        | $\pm$ 0.11        |
| <b>Miscellaneous</b>              |      |            |             |                   |             |                   |             |                   |             |                   |
| Inositol, myo                     | 1.00 | $\pm$ 0.12 | 0.88        | $\pm$ 0.06        | 0.73        | $\pm$ 0.08        | <b>0.64</b> | $\pm$ <b>0.01</b> | 0.77        | $\pm$ 0.04        |
| Phosphoric acid                   | 1.00 | $\pm$ 0.07 | <b>0.63</b> | $\pm$ <b>0.07</b> | <b>0.68</b> | $\pm$ <b>0.10</b> | <b>0.66</b> | $\pm$ <b>0.03</b> | 1.03        | $\pm$ 0.03        |
| Putrescine                        | 1.00 | $\pm$ 0.11 | 1.78        | $\pm$ 0.22        | 1.75        | $\pm$ 0.21        | 0.48        | $\pm$ 0.10        | 0.64        | $\pm$ 0.10        |

**Supplemental Table 13.** Comparison of metabolic levels of breaker-3 DAF stage fruits from wild type, fumarase and malate dehydrogenase antisense plants. Data are normalized to the mean response calculated for the wild type of each measure batch. Values are presented as the mean  $\pm$  SE of 6 biological determinations. The values that are significantly different by t test from the wild type are set in bold type ( $P < 0.05$ ). Red and blue indicate values that are significantly increased or decreased, respectively.

|                                  | WT   |            | F4          |                   | F6          |                   | MDH14       |                   | MDH21       |                   |
|----------------------------------|------|------------|-------------|-------------------|-------------|-------------------|-------------|-------------------|-------------|-------------------|
|                                  | Fold | SE         | Fold        | SE                | Fold        | SE                | Fold        | SE                | Fold        | SE                |
| <b>Amino acids</b>               |      |            |             |                   |             |                   |             |                   |             |                   |
| Alanine                          | 1.00 | $\pm$ 0.03 | 0.95        | $\pm$ 0.08        | <b>1.46</b> | $\pm$ <b>0.01</b> | 1.09        | $\pm$ 0.08        | 1.04        | $\pm$ 0.04        |
| Alanine, beta                    | 1.00 | $\pm$ 0.04 | 1.20        | $\pm$ 0.04        | 1.29        | $\pm$ 0.18        | 1.92        | $\pm$ 0.18        | 1.28        | $\pm$ 0.25        |
| Aspartic acid                    | 1.00 | $\pm$ 0.05 | 1.01        | $\pm$ 0.10        | 1.13        | $\pm$ 0.02        | <b>3.46</b> | $\pm$ <b>0.06</b> | <b>2.02</b> | $\pm$ <b>0.13</b> |
| GABA                             | 1.00 | $\pm$ 0.08 | <b>1.43</b> | $\pm$ <b>0.00</b> | 1.37        | $\pm$ 0.03        | 0.64        | $\pm$ 0.02        | 0.56        | $\pm$ 0.06        |
| Glutamine                        | 1.00 | $\pm$ 0.11 | <b>1.70</b> | $\pm$ <b>0.03</b> | 1.17        | $\pm$ 0.09        | <b>1.98</b> | $\pm$ <b>0.02</b> | 1.50        | $\pm$ 0.05        |
| Glycine                          | 1.00 | $\pm$ 0.03 | 0.89        | $\pm$ 0.06        | <b>0.57</b> | $\pm$ <b>0.01</b> | <b>1.43</b> | $\pm$ <b>0.05</b> | 0.92        | $\pm$ 0.01        |
| Isoleucine                       | 1.00 | $\pm$ 0.15 | <b>2.22</b> | $\pm$ <b>0.11</b> | 2.11        | $\pm$ 0.23        | <b>3.97</b> | $\pm$ <b>0.29</b> | 3.11        | $\pm$ 2.01        |
| Methionine                       | 1.00 | $\pm$ 0.01 | <b>1.15</b> | $\pm$ <b>0.01</b> | 1.94        | $\pm$ 0.18        | <b>1.49</b> | $\pm$ <b>0.03</b> | 1.58        | $\pm$ 0.15        |
| Phenylalanine                    | 1.00 | $\pm$ 0.09 | 0.91        | $\pm$ 0.01        | 1.01        | $\pm$ 0.01        | 1.01        | $\pm$ 0.00        | <b>0.21</b> | $\pm$ <b>0.00</b> |
| Serine                           | 1.00 | $\pm$ 0.03 | <b>0.57</b> | $\pm$ <b>0.04</b> | 1.05        | $\pm$ 0.10        | 0.90        | $\pm$ 0.02        | 0.74        | $\pm$ 0.07        |
| Threonine                        | 1.00 | $\pm$ 0.18 | 1.44        | $\pm$ 0.03        | <b>2.24</b> | $\pm$ <b>0.10</b> | <b>6.01</b> | $\pm$ <b>0.88</b> | <b>6.89</b> | $\pm$ <b>0.04</b> |
| Tryptophan                       | 1.00 | $\pm$ 0.05 | 1.32        | $\pm$ 0.10        | 1.54        | $\pm$ 0.12        | 1.80        | $\pm$ 0.35        | 1.24        | $\pm$ 0.25        |
| Valine                           | 1.00 | $\pm$ 0.06 | 1.02        | $\pm$ 0.03        | 1.13        | $\pm$ 0.02        | <b>2.23</b> | $\pm$ <b>0.20</b> | 0.80        | $\pm$ 0.05        |
| <b>Organic acids</b>             |      |            |             |                   |             |                   |             |                   |             |                   |
| Citric acid                      | 1.00 | $\pm$ 0.05 | 1.01        | $\pm$ 0.01        | 1.08        | $\pm$ 0.02        | 1.09        | $\pm$ 0.05        | 1.22        | $\pm$ 0.06        |
| Fumaric acid                     | 1.00 | $\pm$ 0.13 | 0.50        | $\pm$ 0.04        | 0.61        | $\pm$ 0.04        | <b>2.01</b> | $\pm$ <b>0.05</b> | <b>2.72</b> | $\pm$ <b>0.17</b> |
| Glyceric acid                    | 1.00 | $\pm$ 0.07 | 0.78        | $\pm$ 0.00        | 1.31        | $\pm$ 0.36        | 1.13        | $\pm$ 0.25        | 1.03        | $\pm$ 0.02        |
| Malic acid                       | 1.00 | $\pm$ 0.02 | <b>0.75</b> | $\pm$ <b>0.00</b> | <b>0.73</b> | $\pm$ <b>0.04</b> | <b>2.18</b> | $\pm$ <b>0.04</b> | <b>2.08</b> | $\pm$ <b>0.01</b> |
| Threonic acid                    | 1.00 | $\pm$ 0.11 | 1.22        | $\pm$ 0.04        | 1.02        | $\pm$ 0.04        | 1.17        | $\pm$ 0.06        | 1.55        | $\pm$ 0.23        |
| <b>Sugars and Sugars alcohol</b> |      |            |             |                   |             |                   |             |                   |             |                   |
| Fructose                         | 1.00 | $\pm$ 0.12 | 1.07        | $\pm$ 0.00        | 1.08        | $\pm$ 0.01        | 0.92        | $\pm$ 0.10        | 0.93        | $\pm$ 0.01        |
| Glucose                          | 1.00 | $\pm$ 0.06 | 0.77        | $\pm$ 0.02        | 0.84        | $\pm$ 0.05        | 0.86        | $\pm$ 0.09        | 0.83        | $\pm$ 0.03        |
| Raffinose                        | 1.00 | $\pm$ 0.05 | 7.33        | $\pm$ 1.35        | <b>3.81</b> | $\pm$ <b>0.36</b> | 0.71        | $\pm$ 0.07        | 1.40        | $\pm$ 0.13        |
| Sucrose                          | 1.00 | $\pm$ 0.06 | 0.97        | $\pm$ 0.00        | 0.80        | $\pm$ 0.11        | 0.79        | $\pm$ 0.00        | 0.94        | $\pm$ 0.01        |
| Xylose                           | 1.00 | $\pm$ 0.05 | 0.92        | $\pm$ 0.02        | 0.87        | $\pm$ 0.02        | 0.88        | $\pm$ 0.08        | 1.10        | $\pm$ 0.01        |
| <b>Miscellaneous</b>             |      |            |             |                   |             |                   |             |                   |             |                   |
| Inositol, myo                    | 1.00 | $\pm$ 0.13 | 1.22        | $\pm$ 0.02        | 1.48        | $\pm$ 0.09        | 1.11        | $\pm$ 0.10        | 1.51        | $\pm$ 0.00        |
| Inositol-1P                      | 1.00 | $\pm$ 0.07 | 1.06        | $\pm$ 0.00        | 1.18        | $\pm$ 0.04        | 1.19        | $\pm$ 0.05        | 1.26        | $\pm$ 0.02        |
| Phosphoric acid                  | 1.00 | $\pm$ 0.01 | 0.95        | $\pm$ 0.06        | 1.25        | $\pm$ 0.14        | 1.32        | $\pm$ 0.17        | 1.18        | $\pm$ 0.16        |

**Supplemental Table 14.** Comparison of metabolic levels of breaker-1 DAF fruits from wild type, fumarase and malate dehydrogenase antisense plants. Data are normalized to the mean response calculated for the wild type of each measure batch. Values are presented as the mean  $\pm$  SE of 6 biological determinations. The values that are significantly different by t test from the wild type are set in bold type ( $P < 0.05$ ). Red and blue indicate values that are significantly increased or decreased, respectively.

|                                  | WT   |            | F4          |                   | F6          |                   | MDH14       |                   | MDH21       |                   |
|----------------------------------|------|------------|-------------|-------------------|-------------|-------------------|-------------|-------------------|-------------|-------------------|
|                                  | Fold | SE         | Fold        | SE                | Fold        | SE                | Fold        | SE                | Fold        | SE                |
| <b>Amino acids</b>               |      |            |             |                   |             |                   |             |                   |             |                   |
| Alanine                          | 1.00 | $\pm$ 0.05 | <b>0.82</b> | $\pm$ <b>0.04</b> | 1.04        | $\pm$ 0.08        | 1.04        | $\pm$ 0.05        | 1.02        | $\pm$ 0.02        |
| Alanine, beta                    | 1.00 | $\pm$ 0.01 | 1.28        | $\pm$ 0.18        | 1.27        | $\pm$ 0.16        | 1.32        | $\pm$ 0.20        | 1.13        | $\pm$ 0.12        |
| Aspartic acid                    | 1.00 | $\pm$ 0.04 | 0.93        | $\pm$ 0.03        | 0.92        | $\pm$ 0.07        | <b>2.25</b> | $\pm$ <b>0.17</b> | <b>1.48</b> | $\pm$ <b>0.06</b> |
| GABA                             | 1.00 | $\pm$ 0.09 | <b>1.45</b> | $\pm$ <b>0.13</b> | 1.19        | $\pm$ 0.14        | <b>0.47</b> | $\pm$ <b>0.04</b> | <b>0.53</b> | $\pm$ <b>0.01</b> |
| Glutamine                        | 1.00 | $\pm$ 0.02 | 1.21        | $\pm$ 0.15        | <b>3.76</b> | $\pm$ <b>0.22</b> | 1.15        | $\pm$ 0.13        | 1.24        | $\pm$ 0.11        |
| Glycine                          | 1.00 | $\pm$ 0.04 | 1.00        | $\pm$ 0.11        | 1.23        | $\pm$ 0.16        | <b>1.47</b> | $\pm$ <b>0.11</b> | 1.20        | $\pm$ 0.12        |
| Isoleucine                       | 1.00 | $\pm$ 0.10 | 1.78        | $\pm$ 0.34        | 1.60        | $\pm$ 0.23        | <b>3.30</b> | $\pm$ <b>0.48</b> | <b>2.25</b> | $\pm$ <b>0.24</b> |
| Methionine                       | 1.00 | $\pm$ 0.07 | 0.71        | $\pm$ 0.13        | <b>1.51</b> | $\pm$ <b>0.11</b> | <b>0.69</b> | $\pm$ <b>0.08</b> | <b>0.69</b> | $\pm$ <b>0.05</b> |
| Phenylalanine                    | 1.00 | $\pm$ 0.08 | 1.04        | $\pm$ 0.04        | 1.30        | $\pm$ 0.15        | <b>2.69</b> | $\pm$ <b>0.11</b> | <b>1.79</b> | $\pm$ <b>0.08</b> |
| Serine                           | 1.00 | $\pm$ 0.12 | 1.08        | $\pm$ 0.13        | 0.99        | $\pm$ 0.10        | 1.47        | $\pm$ 0.38        | <b>1.57</b> | $\pm$ <b>0.14</b> |
| Threonine                        | 1.00 | $\pm$ 0.08 | 1.22        | $\pm$ 0.13        | 1.13        | $\pm$ 0.20        | <b>2.28</b> | $\pm$ <b>0.23</b> | <b>2.06</b> | $\pm$ <b>0.15</b> |
| Tryptophan                       | 1.00 | $\pm$ 0.11 | 1.16        | $\pm$ 0.15        | 1.22        | $\pm$ 0.07        | 1.01        | $\pm$ 0.04        | 1.03        | $\pm$ 0.10        |
| Valine                           | 1.00 | $\pm$ 0.02 | 1.03        | $\pm$ 0.02        | <b>0.86</b> | $\pm$ <b>0.04</b> | <b>1.42</b> | $\pm$ <b>0.06</b> | <b>1.26</b> | $\pm$ <b>0.07</b> |
| <b>Organic acids</b>             |      |            |             |                   |             |                   |             |                   |             |                   |
| Citric acid                      | 1.00 | $\pm$ 0.04 | 1.04        | $\pm$ 0.05        | 1.03        | $\pm$ 0.06        | 1.04        | $\pm$ 0.05        | 1.09        | $\pm$ 0.01        |
| Fumaric acid                     | 1.00 | $\pm$ 0.07 | <b>0.49</b> | $\pm$ <b>0.02</b> | <b>0.47</b> | $\pm$ <b>0.03</b> | <b>1.28</b> | $\pm$ <b>0.02</b> | <b>1.56</b> | $\pm$ <b>0.07</b> |
| Glyceric acid                    | 1.00 | $\pm$ 0.10 | 0.81        | $\pm$ 0.03        | 1.10        | $\pm$ 0.16        | 1.54        | $\pm$ 0.35        | 1.27        | $\pm$ 0.16        |
| Malic acid                       | 1.00 | $\pm$ 0.02 | <b>0.57</b> | $\pm$ <b>0.04</b> | <b>0.50</b> | $\pm$ <b>0.06</b> | <b>1.43</b> | $\pm$ <b>0.04</b> | <b>1.95</b> | $\pm$ <b>0.06</b> |
| Threonic acid                    | 1.00 | $\pm$ 0.08 | 1.14        | $\pm$ 0.11        | <b>1.63</b> | $\pm$ <b>0.15</b> | <b>1.71</b> | $\pm$ <b>0.01</b> | <b>1.77</b> | $\pm$ <b>0.02</b> |
| <b>Sugars and Sugars alcohol</b> |      |            |             |                   |             |                   |             |                   |             |                   |
| Fructose                         | 1.00 | $\pm$ 0.03 | <b>0.65</b> | $\pm$ <b>0.06</b> | <b>0.74</b> | $\pm$ <b>0.03</b> | <b>1.03</b> | $\pm$ <b>0.05</b> | <b>0.92</b> | $\pm$ <b>0.01</b> |
| Glucose                          | 1.00 | $\pm$ 0.06 | <b>0.69</b> | $\pm$ <b>0.07</b> | <b>0.74</b> | $\pm$ <b>0.06</b> | 0.85        | $\pm$ 0.02        | 0.94        | $\pm$ 0.04        |
| Raffinose                        | 1.00 | $\pm$ 0.03 | <b>2.55</b> | $\pm$ <b>0.23</b> | 1.10        | $\pm$ 0.10        | <b>0.83</b> | $\pm$ <b>0.07</b> | <b>0.73</b> | $\pm$ <b>0.05</b> |
| Sucrose                          | 1.00 | $\pm$ 0.07 | <b>1.31</b> | $\pm$ <b>0.07</b> | <b>1.68</b> | $\pm$ <b>0.11</b> | <b>0.89</b> | $\pm$ <b>0.06</b> | <b>1.76</b> | $\pm$ <b>0.12</b> |
| Xylose                           | 1.00 | $\pm$ 0.11 | 1.03        | $\pm$ 0.05        | 1.08        | $\pm$ 0.08        | 1.23        | $\pm$ 0.10        | 1.42        | $\pm$ 0.16        |
| <b>Miscellaneous</b>             |      |            |             |                   |             |                   |             |                   |             |                   |
| Inositol, myo                    | 1.00 | $\pm$ 0.02 | 0.97        | $\pm$ 0.04        | 0.92        | $\pm$ 0.04        | <b>0.76</b> | $\pm$ <b>0.05</b> | <b>1.15</b> | $\pm$ <b>0.02</b> |
| Inositol-1P                      | 1.00 | $\pm$ 0.01 | 1.09        | $\pm$ 0.03        | 1.05        | $\pm$ 0.06        | <b>1.06</b> | $\pm$ <b>0.01</b> | <b>1.08</b> | $\pm$ <b>0.01</b> |
| Phosphoric acid                  | 1.00 | $\pm$ 0.06 | 1.12        | $\pm$ 0.07        | 1.07        | $\pm$ 0.12        | 1.26        | $\pm$ 0.16        | 1.06        | $\pm$ 0.03        |

**Supplemental Table 15.** Comparison of metabolic levels of breaker stage fruits from wild type, fumarase and malate dehydrogenase antisense plants. Data are normalized to the mean response calculated for the wild type of each measure batch. Values are presented as the mean  $\pm$  SE of 6 biological determinations. The values that are significantly different by t test from the wild type are set in bold type ( $P < 0.05$ ). Red and blue indicate values that are significantly increased or decreased, respectively.

|                                  | WT   |            | F4          |                   | F6          |                   | MDH14       |                   | MDH21       |                   |
|----------------------------------|------|------------|-------------|-------------------|-------------|-------------------|-------------|-------------------|-------------|-------------------|
|                                  | Fold | SE         | Fold        | SE                | Fold        | SE                | Fold        | SE                | Fold        | SE                |
| <b>Amino acids</b>               |      |            |             |                   |             |                   |             |                   |             |                   |
| Alanine                          | 1.00 | $\pm$ 0.11 | 0.81        | $\pm$ 0.15        | 0.81        | $\pm$ 0.05        | <b>0.47</b> | $\pm$ <b>0.06</b> | <b>0.63</b> | $\pm$ <b>0.08</b> |
| Alanine, beta                    | 1.00 | $\pm$ 0.19 | 1.17        | $\pm$ 0.18        | 1.07        | $\pm$ 0.16        | 1.13        | $\pm$ 0.13        | 1.19        | $\pm$ 0.16        |
| Aspartic acid                    | 1.00 | $\pm$ 0.07 | <b>0.73</b> | $\pm$ <b>0.07</b> | 0.92        | $\pm$ 0.04        | 1.08        | $\pm$ 0.60        | 0.81        | $\pm$ 0.06        |
| GABA                             | 1.00 | $\pm$ 0.09 | <b>0.59</b> | $\pm$ <b>0.05</b> | <b>5.47</b> | $\pm$ <b>0.81</b> | <b>0.77</b> | $\pm$ <b>0.04</b> | <b>1.34</b> | $\pm$ <b>0.07</b> |
| Glutamine                        | 1.00 | $\pm$ 0.03 | <b>1.49</b> | $\pm$ <b>0.25</b> | <b>0.77</b> | $\pm$ <b>0.03</b> | <b>0.85</b> | $\pm$ <b>0.08</b> | <b>1.40</b> | $\pm$ <b>0.04</b> |
| Glycine                          | 1.00 | $\pm$ 0.17 | 1.00        | $\pm$ 0.15        | 1.17        | $\pm$ 0.19        | 0.96        | $\pm$ 0.19        | 0.98        | $\pm$ 0.21        |
| Isoleucine                       | 1.00 | $\pm$ 0.15 | 0.83        | $\pm$ 0.08        | <b>1.62</b> | $\pm$ <b>0.18</b> | 0.94        | $\pm$ 0.10        | 0.83        | $\pm$ 0.08        |
| Methionine                       | 1.00 | $\pm$ 0.08 | <b>1.46</b> | $\pm$ <b>0.13</b> | 1.13        | $\pm$ 0.14        | <b>0.58</b> | $\pm$ <b>0.07</b> | <b>0.59</b> | $\pm$ <b>0.02</b> |
| Phenylalanine                    | 1.00 | $\pm$ 0.11 | 0.95        | $\pm$ 0.07        | <b>4.66</b> | $\pm$ <b>0.56</b> | <b>1.73</b> | $\pm$ <b>0.30</b> | <b>2.02</b> | $\pm$ <b>0.28</b> |
| Serine                           | 1.00 | $\pm$ 0.07 | <b>0.69</b> | $\pm$ <b>0.05</b> | 1.00        | $\pm$ 0.08        | 0.84        | $\pm$ 0.13        | <b>1.28</b> | $\pm$ <b>0.07</b> |
| Threonine                        | 1.00 | $\pm$ 0.16 | 1.02        | $\pm$ 0.13        | <b>1.59</b> | $\pm$ <b>0.09</b> | 1.05        | $\pm$ 0.26        | 1.29        | $\pm$ 0.20        |
| Tryptophan                       | 1.00 | $\pm$ 0.21 | 1.38        | $\pm$ 0.23        | 1.53        | $\pm$ 0.19        | 1.32        | $\pm$ 0.16        | 0.94        | $\pm$ 0.12        |
| Valine                           | 1.00 | $\pm$ 0.08 | 1.16        | $\pm$ 0.06        | 1.78        | $\pm$ 0.08        | <b>0.87</b> | $\pm$ <b>0.06</b> | <b>1.69</b> | $\pm$ <b>0.10</b> |
| <b>Organic acids</b>             |      |            |             |                   |             |                   |             |                   |             |                   |
| Citric acid                      | 1.00 | $\pm$ 0.05 | 1.01        | $\pm$ 0.04        | 1.05        | $\pm$ 0.06        | 1.08        | $\pm$ 0.07        | 1.04        | $\pm$ 0.02        |
| Fumaric acid                     | 1.00 | $\pm$ 0.15 | <b>0.46</b> | $\pm$ <b>0.03</b> | <b>0.47</b> | $\pm$ <b>0.02</b> | <b>1.98</b> | $\pm$ <b>0.09</b> | <b>1.89</b> | $\pm$ <b>0.00</b> |
| Glyceric acid                    | 1.00 | $\pm$ 0.21 | 0.79        | $\pm$ 0.05        | 0.82        | $\pm$ 0.07        | 0.86        | $\pm$ 0.12        | 0.69        | $\pm$ 0.11        |
| Malic acid                       | 1.00 | $\pm$ 0.05 | <b>0.78</b> | $\pm$ <b>0.06</b> | <b>0.76</b> | $\pm$ <b>0.06</b> | <b>0.74</b> | $\pm$ <b>0.09</b> | <b>1.78</b> | $\pm$ <b>0.03</b> |
| Threonic acid                    | 1.00 | $\pm$ 0.14 | 0.91        | $\pm$ 0.10        | 0.91        | $\pm$ 0.10        | 1.20        | $\pm$ 0.12        | 1.14        | $\pm$ 0.05        |
| <b>Sugars and Sugars alcohol</b> |      |            |             |                   |             |                   |             |                   |             |                   |
| Fructose                         | 1.00 | $\pm$ 0.09 | 0.90        | $\pm$ 0.06        | 1.02        | $\pm$ 0.12        | 1.23        | $\pm$ 0.10        | 1.21        | $\pm$ 0.06        |
| Glucose                          | 1.00 | $\pm$ 0.04 | <b>0.74</b> | $\pm$ <b>0.05</b> | <b>0.80</b> | $\pm$ <b>0.03</b> | <b>0.98</b> | $\pm$ <b>0.06</b> | <b>0.85</b> | $\pm$ <b>0.03</b> |
| Raffinose                        | 1.00 | $\pm$ 0.05 | <b>2.81</b> | $\pm$ <b>0.36</b> | <b>2.08</b> | $\pm$ <b>0.09</b> | <b>1.29</b> | $\pm$ <b>0.05</b> | <b>1.29</b> | $\pm$ <b>0.07</b> |
| Sucrose                          | 1.00 | $\pm$ 0.07 | <b>0.64</b> | $\pm$ <b>0.08</b> | 0.91        | $\pm$ 0.06        | 0.97        | $\pm$ 0.04        | 1.06        | $\pm$ 0.04        |
| Xylose                           | 1.00 | $\pm$ 0.05 | 0.99        | $\pm$ 0.06        | 0.89        | $\pm$ 0.07        | 1.01        | $\pm$ 0.11        | 1.29        | $\pm$ 0.22        |
| <b>Miscellaneous</b>             |      |            |             |                   |             |                   |             |                   |             |                   |
| Inositol, myo                    | 1.00 | $\pm$ 0.08 | 1.15        | $\pm$ 0.05        | 0.90        | $\pm$ 0.05        | 0.75        | $\pm$ 0.06        | 0.94        | $\pm$ 0.07        |
| Inositol-1P                      | 1.00 | $\pm$ 0.03 | 1.03        | $\pm$ 0.06        | 1.06        | $\pm$ 0.04        | 1.07        | $\pm$ 0.05        | 1.03        | $\pm$ 0.00        |
| Phosphoric acid                  | 1.00 | $\pm$ 0.16 | 1.33        | $\pm$ 0.09        | 1.12        | $\pm$ 0.09        | 1.08        | $\pm$ 0.08        | 1.26        | $\pm$ 0.17        |

**Supplemental Table 16.** Comparison of metabolic levels of breaker+1 DAF fruits from wild type, fumarase and malate dehydrogenase antisense plants. Data are normalized to the mean response calculated for the wild type of each measure batch. Values are presented as the mean  $\pm$  SE of 6 biological determinations. The values that are significantly different by t test from the wild type are set in bold type ( $P < 0.05$ ). Red and blue indicate values that are significantly increased or decreased, respectively.

|                                  | WT   |            | F4          |                   | F6          |                   | MDH14       |                   | MDH21       |                   |
|----------------------------------|------|------------|-------------|-------------------|-------------|-------------------|-------------|-------------------|-------------|-------------------|
|                                  | Fold | SE         | Fold        | SE                | Fold        | SE                | Fold        | SE                | Fold        | SE                |
| <b>Amino acids</b>               |      |            |             |                   |             |                   |             |                   |             |                   |
| Alanine                          | 1.00 | $\pm$ 0.06 | 1.14        | $\pm$ 0.19        | <b>1.52</b> | $\pm$ <b>0.10</b> | <b>0.81</b> | $\pm$ <b>0.04</b> | 0.82        | $\pm$ 0.08        |
| Alanine, beta                    | 1.00 | $\pm$ 0.09 | 1.09        | $\pm$ 0.10        | <b>3.14</b> | $\pm$ <b>0.22</b> | <b>0.51</b> | $\pm$ <b>0.07</b> | 1.01        | $\pm$ 0.11        |
| Asparagine                       | 1.00 | $\pm$ 0.10 | 0.89        | $\pm$ 0.14        | <b>6.91</b> | $\pm$ <b>0.24</b> | <b>0.46</b> | $\pm$ <b>0.01</b> | 1.21        | $\pm$ 0.08        |
| Aspartic acid                    | 1.00 | $\pm$ 0.13 | 0.88        | $\pm$ 0.15        | <b>4.26</b> | $\pm$ <b>0.14</b> | 0.71        | $\pm$ 0.31        | <b>1.59</b> | $\pm$ <b>0.16</b> |
| GABA                             | 1.00 | $\pm$ 0.11 | 1.00        | $\pm$ 0.19        | <b>8.80</b> | $\pm$ <b>0.79</b> | 1.26        | $\pm$ 0.08        | <b>4.03</b> | $\pm$ <b>0.39</b> |
| Glutamine                        | 1.00 | $\pm$ 0.10 | 0.84        | $\pm$ 0.12        | 0.82        | $\pm$ 0.11        | <b>0.70</b> | $\pm$ <b>0.01</b> | <b>0.61</b> | $\pm$ <b>0.04</b> |
| Glycine                          | 1.00 | $\pm$ 0.06 | <b>1.59</b> | $\pm$ <b>0.23</b> | <b>2.65</b> | $\pm$ <b>0.22</b> | <b>0.62</b> | $\pm$ <b>0.04</b> | <b>0.69</b> | $\pm$ <b>0.09</b> |
| Isoleucine                       | 1.00 | $\pm$ 0.09 | 1.03        | $\pm$ 0.17        | <b>2.50</b> | $\pm$ <b>0.11</b> | <b>0.40</b> | $\pm$ <b>0.05</b> | <b>0.52</b> | $\pm$ <b>0.04</b> |
| Methionine                       | 1.00 | $\pm$ 0.13 | <b>0.58</b> | $\pm$ <b>0.08</b> | <b>1.99</b> | $\pm$ <b>0.30</b> | <b>0.61</b> | $\pm$ <b>0.07</b> | 1.14        | $\pm$ 0.06        |
| Phenylalanine                    | 1.00 | $\pm$ 0.08 | 1.03        | $\pm$ 0.05        | <b>9.60</b> | $\pm$ <b>0.29</b> | 1.05        | $\pm$ 0.03        | <b>1.45</b> | $\pm$ <b>0.09</b> |
| Serine                           | 1.00 | $\pm$ 0.06 | 0.93        | $\pm$ 0.13        | <b>2.53</b> | $\pm$ <b>0.04</b> | <b>0.76</b> | $\pm$ <b>0.05</b> | <b>0.71</b> | $\pm$ <b>0.04</b> |
| Threonine                        | 1.00 | $\pm$ 0.16 | <b>1.84</b> | $\pm$ <b>0.31</b> | <b>5.10</b> | $\pm$ <b>0.20</b> | 0.68        | $\pm$ 0.12        | 0.91        | $\pm$ 0.12        |
| Tryptophan                       | 1.00 | $\pm$ 0.13 | 0.96        | $\pm$ 0.14        | <b>5.89</b> | $\pm$ <b>0.48</b> | 1.00        | $\pm$ 0.19        | 1.25        | $\pm$ 0.18        |
| Valine                           | 1.00 | $\pm$ 0.14 | <b>0.29</b> | $\pm$ <b>0.01</b> | <b>1.92</b> | $\pm$ <b>0.07</b> | <b>0.33</b> | $\pm$ <b>0.01</b> | 0.40        | $\pm$ 0.05        |
| <b>Organic acids</b>             |      |            |             |                   |             |                   |             |                   |             |                   |
| Citric acid                      | 1.00 | $\pm$ 0.13 | 0.93        | $\pm$ 0.16        | 0.82        | $\pm$ 0.14        | 0.90        | $\pm$ 0.05        | 1.45        | $\pm$ 0.20        |
| Fumaric acid                     | 1.00 | $\pm$ 0.12 | <b>0.52</b> | $\pm$ <b>0.12</b> | <b>0.25</b> | $\pm$ <b>0.01</b> | <b>1.53</b> | $\pm$ <b>0.02</b> | <b>1.50</b> | $\pm$ <b>0.06</b> |
| Glyceric acid                    | 1.00 | $\pm$ 0.14 | 1.09        | $\pm$ 0.26        | 0.85        | $\pm$ 0.09        | 0.94        | $\pm$ 0.11        | 0.97        | $\pm$ 0.02        |
| Malic acid                       | 1.00 | $\pm$ 0.16 | 0.69        | $\pm$ 0.12        | <b>0.34</b> | $\pm$ <b>0.04</b> | 1.30        | $\pm$ 0.04        | 1.23        | $\pm$ 0.06        |
| Threonic acid                    | 1.00 | $\pm$ 0.12 | <b>0.43</b> | $\pm$ <b>0.02</b> | 0.70        | $\pm$ 0.08        | <b>1.40</b> | $\pm$ <b>0.01</b> | 1.10        | $\pm$ 0.05        |
| <b>Sugars and Sugars alcohol</b> |      |            |             |                   |             |                   |             |                   |             |                   |
| Fructose                         | 1.00 | $\pm$ 0.14 | 0.97        | $\pm$ 0.16        | <b>0.49</b> | $\pm$ <b>0.04</b> | 1.21        | $\pm$ 0.04        | 1.26        | $\pm$ 0.13        |
| Glucose                          | 1.00 | $\pm$ 0.11 | 0.83        | $\pm$ 0.14        | <b>0.56</b> | $\pm$ <b>0.05</b> | 0.91        | $\pm$ 0.06        | 0.85        | $\pm$ 0.08        |
| Raffinose                        | 1.00 | $\pm$ 0.12 | <b>1.89</b> | $\pm$ <b>0.14</b> | 1.06        | $\pm$ 0.09        | 0.70        | $\pm$ 0.05        | 0.76        | $\pm$ 0.01        |
| Sucrose                          | 1.00 | $\pm$ 0.08 | 1.14        | $\pm$ 0.16        | 1.01        | $\pm$ 0.05        | <b>1.91</b> | $\pm$ <b>0.10</b> | <b>1.95</b> | $\pm$ <b>0.10</b> |
| Xylose                           | 1.00 | $\pm$ 0.09 | 1.15        | $\pm$ 0.11        | 0.97        | $\pm$ 0.08        | 1.22        | $\pm$ 0.09        | 1.20        | $\pm$ 0.21        |
| <b>Miscellaneous</b>             |      |            |             |                   |             |                   |             |                   |             |                   |
| Inositol, myo                    | 1.00 | $\pm$ 0.09 | 0.90        | $\pm$ 0.12        | 0.91        | $\pm$ 0.03        | 0.95        | $\pm$ 0.06        | 0.87        | $\pm$ 0.08        |
| Inositol-1P                      | 1.00 | $\pm$ 0.09 | 1.07        | $\pm$ 0.12        | 0.90        | $\pm$ 0.04        | 0.96        | $\pm$ 0.01        | 0.93        | $\pm$ 0.04        |
| Phosphoric acid                  | 1.00 | $\pm$ 0.15 | 0.77        | $\pm$ 0.12        | 1.19        | $\pm$ 0.07        | <b>0.24</b> | $\pm$ <b>0.02</b> | 0.62        | $\pm$ 0.05        |

**Supplemental Table 17.** Comparison of metabolic levels of breaker+3 DAF fruits from wild type, fumarase and malate dehydrogenase antisense plants. Data are normalized to the mean response calculated for the wild type of each measure batch. Values are presented as the mean  $\pm$  SE of 6 biological determinations. The values that are significantly different by t test from the wild type are set in bold type ( $P < 0.05$ ). Red and blue indicate values that are significantly increased or decreased, respectively.

|                                  | WT   |            | F4          |                   | F6          |                   | MDH14       |                   | MDH21       |                   |
|----------------------------------|------|------------|-------------|-------------------|-------------|-------------------|-------------|-------------------|-------------|-------------------|
|                                  | Fold | SE         | Fold        | SE                | Fold        | SE                | Fold        | SE                | Fold        | SE                |
| <b>Amino acids</b>               |      |            |             |                   |             |                   |             |                   |             |                   |
| Alanine                          | 1.00 | $\pm$ 0.09 | 0.93        | $\pm$ 0.08        | <b>1.85</b> | $\pm$ <b>0.01</b> | 0.84        | $\pm$ 0.10        | <b>0.68</b> | $\pm$ <b>0.07</b> |
| Alanine, beta                    | 1.00 | $\pm$ 0.19 | 0.83        | $\pm$ 0.12        | <b>6.42</b> | $\pm$ <b>0.06</b> | 1.42        | $\pm$ 0.11        | 1.31        | $\pm$ 0.10        |
| Asparagine                       | 1.00 | $\pm$ 0.09 | <b>0.53</b> | $\pm$ <b>0.06</b> | <b>3.18</b> | $\pm$ <b>0.31</b> | <b>0.28</b> | $\pm$ <b>0.03</b> | <b>0.38</b> | $\pm$ <b>0.03</b> |
| Aspartic acid                    | 1.00 | $\pm$ 0.05 | <b>0.87</b> | $\pm$ <b>0.01</b> | <b>2.23</b> | $\pm$ <b>0.05</b> | 0.69        | $\pm$ 0.23        | 0.89        | $\pm$ 0.05        |
| GABA                             | 1.00 | $\pm$ 0.06 | <b>0.40</b> | $\pm$ <b>0.03</b> | <b>4.96</b> | $\pm$ <b>0.60</b> | <b>0.17</b> | $\pm$ <b>0.01</b> | <b>0.56</b> | $\pm$ <b>0.03</b> |
| Glutamine                        | 1.00 | $\pm$ 0.01 | 1.13        | $\pm$ 0.16        | <b>1.97</b> | $\pm$ <b>0.17</b> | <b>1.89</b> | $\pm$ <b>0.18</b> | <b>1.47</b> | $\pm$ <b>0.13</b> |
| Glycine                          | 1.00 | $\pm$ 0.14 | <b>1.76</b> | $\pm$ <b>0.15</b> | <b>7.07</b> | $\pm$ <b>0.53</b> | <b>3.01</b> | $\pm$ <b>0.23</b> | 1.26        | $\pm$ 0.22        |
| Isoleucine                       | 1.00 | $\pm$ 0.09 | <b>1.59</b> | $\pm$ <b>0.04</b> | <b>5.37</b> | $\pm$ <b>0.40</b> | <b>0.59</b> | $\pm$ <b>0.07</b> | 0.85        | $\pm$ 0.15        |
| Methionine                       | 1.00 | $\pm$ 0.09 | <b>0.65</b> | $\pm$ <b>0.11</b> | <b>2.70</b> | $\pm$ <b>0.10</b> | <b>0.61</b> | $\pm$ <b>0.06</b> | 0.90        | $\pm$ 0.10        |
| Phenylalanine                    | 1.00 | $\pm$ 0.08 | 0.95        | $\pm$ 0.05        | <b>3.50</b> | $\pm$ <b>0.13</b> | <b>0.34</b> | $\pm$ <b>0.03</b> | <b>0.56</b> | $\pm$ <b>0.10</b> |
| Serine                           | 1.00 | $\pm$ 0.06 | <b>1.74</b> | $\pm$ <b>0.05</b> | <b>5.41</b> | $\pm$ <b>0.17</b> | <b>0.42</b> | $\pm$ <b>0.04</b> | <b>0.83</b> | $\pm$ <b>0.03</b> |
| Threonine                        | 1.00 | $\pm$ 0.07 | <b>1.67</b> | $\pm$ <b>0.16</b> | <b>7.28</b> | $\pm$ <b>0.60</b> | <b>0.68</b> | $\pm$ <b>0.05</b> | 0.77        | $\pm$ 0.12        |
| Tryptophan                       | 1.00 | $\pm$ 0.08 | 1.04        | $\pm$ 0.09        | <b>6.20</b> | $\pm$ <b>0.78</b> | 0.90        | $\pm$ 0.12        | <b>1.79</b> | $\pm$ <b>0.18</b> |
| Valine                           | 1.00 | $\pm$ 0.11 | 1.43        | $\pm$ 0.19        | <b>6.15</b> | $\pm$ <b>0.20</b> | 0.70        | $\pm$ 0.09        | <b>0.50</b> | $\pm$ <b>0.07</b> |
| <b>Organic acids</b>             |      |            |             |                   |             |                   |             |                   |             |                   |
| Citric acid                      | 1.00 | $\pm$ 0.06 | 0.85        | $\pm$ 0.07        | 1.03        | $\pm$ 0.04        | <b>1.34</b> | $\pm$ <b>0.08</b> | 0.96        | $\pm$ 0.03        |
| Fumaric acid                     | 1.00 | $\pm$ 0.08 | <b>0.52</b> | $\pm$ <b>0.00</b> | <b>0.54</b> | $\pm$ <b>0.01</b> | <b>2.23</b> | $\pm$ <b>0.07</b> | <b>2.23</b> | $\pm$ <b>0.08</b> |
| Glyceric acid                    | 1.00 | $\pm$ 0.10 | 0.93        | $\pm$ 0.06        | 1.22        | $\pm$ 0.03        | 1.12        | $\pm$ 0.14        | 1.03        | $\pm$ 0.15        |
| Malic acid                       | 1.00 | $\pm$ 0.07 | <b>0.58</b> | $\pm$ <b>0.01</b> | <b>0.62</b> | $\pm$ <b>0.01</b> | <b>1.66</b> | $\pm$ <b>0.07</b> | <b>1.51</b> | $\pm$ <b>0.04</b> |
| Threonic acid                    | 1.00 | $\pm$ 0.14 | 0.71        | $\pm$ 0.06        | 0.89        | $\pm$ 0.06        | 1.19        | $\pm$ 0.13        | 0.90        | $\pm$ 0.13        |
| <b>Sugars and Sugars alcohol</b> |      |            |             |                   |             |                   |             |                   |             |                   |
| Fructose                         | 1.00 | $\pm$ 0.05 | <b>0.76</b> | $\pm$ <b>0.02</b> | <b>1.24</b> | $\pm$ <b>0.03</b> | <b>1.29</b> | $\pm$ <b>0.05</b> | <b>1.70</b> | $\pm$ <b>0.11</b> |
| Glucose                          | 1.00 | $\pm$ 0.04 | <b>0.76</b> | $\pm$ <b>0.04</b> | 0.86        | $\pm$ 0.07        | 1.08        | $\pm$ 0.08        | <b>1.23</b> | $\pm$ <b>0.08</b> |
| Raffinose                        | 1.00 | $\pm$ 0.09 | <b>1.33</b> | $\pm$ <b>0.10</b> | <b>1.59</b> | $\pm$ <b>0.03</b> | 0.85        | $\pm$ 0.08        | 0.90        | $\pm$ 0.14        |
| Sucrose                          | 1.00 | $\pm$ 0.02 | <b>0.69</b> | $\pm$ <b>0.04</b> | <b>0.72</b> | $\pm$ <b>0.03</b> | <b>0.65</b> | $\pm$ <b>0.03</b> | <b>1.16</b> | $\pm$ <b>0.08</b> |
| Xylose                           | 1.00 | $\pm$ 0.03 | 1.09        | $\pm$ 0.05        | <b>1.18</b> | $\pm$ <b>0.07</b> | <b>1.25</b> | $\pm$ <b>0.08</b> | 1.13        | $\pm$ 0.11        |
| <b>Miscellaneous</b>             |      |            |             |                   |             |                   |             |                   |             |                   |
| Inositol, myo                    | 1.00 | $\pm$ 0.07 | 1.16        | $\pm$ 0.10        | 1.18        | $\pm$ 0.16        | <b>1.32</b> | $\pm$ <b>0.10</b> | 0.94        | $\pm$ 0.07        |
| Inositol-1P                      | 1.00 | $\pm$ 0.02 | <b>0.95</b> | $\pm$ <b>0.01</b> | 0.97        | $\pm$ 0.01        | 1.00        | $\pm$ 0.03        | 1.01        | $\pm$ 0.04        |
| Phosphoric acid                  | 1.00 | $\pm$ 0.07 | <b>1.98</b> | $\pm$ <b>0.08</b> | 1.25        | $\pm$ 0.15        | <b>0.34</b> | $\pm$ <b>0.05</b> | 0.87        | $\pm$ 0.05        |



**Supplemental Table 18.** Pigment content during fruit development in the mitochondrial fumarase lines. Values are presented as the mean  $\pm$  SE of 3 biological determinations. The values that are significantly different by *t* test from the wild type are set in bold type ( $P < 0.05$ ). nd means not determined. Red and blue indicate values that are significantly increased or decreased, respectively.

|                   | WT                    | F7                                | F4                                | F6                                |
|-------------------|-----------------------|-----------------------------------|-----------------------------------|-----------------------------------|
| <b>20 DAF</b>     |                       |                                   |                                   |                                   |
|                   | mg g <sup>-1</sup> FW |                                   |                                   |                                   |
| Neoxanthin        | 1.50 $\pm$ 0.10       | 1.29                              | 1.43 $\pm$ 0.00                   | 2.12 $\pm$ 0.00                   |
| Violaxanthin      | 1.68 $\pm$ 0.16       | 1.41                              | 1.40 $\pm$ 0.00                   | 1.91 $\pm$ 0.00                   |
| Antheraxanthin    | 1.31 $\pm$ 0.17       | 1.41 $\pm$ 0.18                   | 1.33 $\pm$ 0.08                   | 1.31 $\pm$ 0.06                   |
| Lutein            | 5.51 $\pm$ 0.57       | 5.89 $\pm$ 1.04                   | 5.54 $\pm$ 0.50                   | 5.89 $\pm$ 0.53                   |
| Chlorophyll b     | 14.97 $\pm$ 1.37      | 15.13 $\pm$ 2.45                  | 13.45 $\pm$ 1.80                  | 14.10 $\pm$ 1.40                  |
| Chlorophyll a     | 39.99 $\pm$ 3.19      | 37.64 $\pm$ 4.91                  | 37.16 $\pm$ 4.55                  | 38.76 $\pm$ 2.17                  |
| Lycopene          | nd                    | nd                                | nd                                | nd                                |
| $\beta$ -carotene | 7.44 $\pm$ 0.56       | 7.52 $\pm$ 0.43                   | 7.13 $\pm$ 0.27                   | 9.72 $\pm$ 1.49                   |
| <b>35 DAF</b>     |                       |                                   |                                   |                                   |
|                   | mg g <sup>-1</sup> FW |                                   |                                   |                                   |
| Neoxanthin        | 0.76 $\pm$ 0.13       | 0.60 $\pm$ 0.04                   | 0.82 $\pm$ 0.14                   | 0.79 $\pm$ 0.10                   |
| Violaxanthin      | 1.01 $\pm$ 0.05       | 0.81 $\pm$ 0.15                   | 1.01 $\pm$ 0.01                   | 1.04 $\pm$ 0.04                   |
| Antheraxanthin    | nd                    | nd                                | nd                                | nd                                |
| Lutein            | 2.09 $\pm$ 0.28       | 2.01 $\pm$ 0.04                   | 2.52 $\pm$ 0.41                   | 2.57 $\pm$ 0.21                   |
| Chlorophyll b     | 5.70 $\pm$ 1.26       | 5.15 $\pm$ 0.24                   | 6.51 $\pm$ 1.21                   | 7.32 $\pm$ 0.82                   |
| Chlorophyll a     | 14.28 $\pm$ 1.68      | 14.53 $\pm$ 0.42                  | 18.29 $\pm$ 2.91                  | 19.34 $\pm$ 2.16                  |
| Lycopene          | nd                    | nd                                | nd                                | nd                                |
| $\beta$ -carotene | 2.59 $\pm$ 0.46       | 3.09 $\pm$ 0.39                   | 4.22 $\pm$ 1.36                   | 3.72 $\pm$ 0.76                   |
| <b>48 DAF</b>     |                       |                                   |                                   |                                   |
|                   | mg g <sup>-1</sup> FW |                                   |                                   |                                   |
| Neoxanthin        | 0.73 $\pm$ 0.17       | 0.71 $\pm$ 0.18                   | 0.51 $\pm$ 0.00                   | 0.59 $\pm$ 0.13                   |
| Violaxanthin      | 0.95 $\pm$ 0.18       | 0.75 $\pm$ 0.00                   | 1.22 $\pm$ 0.02                   | 0.66 $\pm$ 0.05                   |
| Antheraxanthin    | 1.21 $\pm$ 0.03       | 1.36 $\pm$ 0.08                   | <b>0.94 <math>\pm</math> 0.01</b> | <b>1.44 <math>\pm</math> 0.01</b> |
| Lutein            | 2.27 $\pm$ 0.78       | 2.43 $\pm$ 0.99                   | 1.83 $\pm$ 0.18                   | 2.14 $\pm$ 0.19                   |
| Chlorophyll b     | 6.83 $\pm$ 0.52       | <b>4.22 <math>\pm</math> 0.42</b> | <b>3.44 <math>\pm</math> 0.60</b> | <b>4.68 <math>\pm</math> 0.56</b> |
| Chlorophyll a     | 16.32 $\pm$ 2.69      | 16.22 $\pm$ 4.69                  | <b>7.50 <math>\pm</math> 0.84</b> | 12.99 $\pm$ 2.11                  |
| Lycopene          | nd                    | nd                                | nd                                | nd                                |
| $\beta$ -carotene | 3.89 $\pm$ 0.75       | 2.99 $\pm$ 1.10                   | 6.85 $\pm$ 0.84                   | 2.53 $\pm$ 0.02                   |
| <b>56 DAF</b>     |                       |                                   |                                   |                                   |
|                   | mg g <sup>-1</sup> FW |                                   |                                   |                                   |
| Neoxanthin        | nd                    | nd                                | nd                                | nd                                |
| Violaxanthin      | 0.38 $\pm$ 0.01       | 0.42 $\pm$ 0.00                   | 0.29 $\pm$ 0.03                   | 0.53 $\pm$ 0.10                   |
| Antheraxanthin    | nd                    | nd                                | nd                                | nd                                |
| Lutein            | 1.49 $\pm$ 0.09       | 1.61 $\pm$ 0.40                   | 1.67 $\pm$ 0.04                   | 1.28 $\pm$ 0.13                   |
| Chlorophyll b     | nd                    | nd                                | nd                                | nd                                |
| Chlorophyll a     | 0.68 $\pm$ 0.08       | 0.76 $\pm$ 0.00                   | 0.65 $\pm$ 0.00                   | <b>0.48 <math>\pm</math> 0.02</b> |
| Lycopene          | 8.64 $\pm$ 1.30       | 11.67 $\pm$ 1.33                  | 10.66 $\pm$ 2.63                  | 6.39 $\pm$ 0.65                   |
| $\beta$ -carotene | 9.09 $\pm$ 0.90       | 8.55 $\pm$ 0.82                   | 8.43 $\pm$ 0.53                   | 7.13 $\pm$ 0.21                   |
| <b>65 DAF</b>     |                       |                                   |                                   |                                   |
|                   | mg g <sup>-1</sup> FW |                                   |                                   |                                   |
| Neoxanthin        | nd                    | nd                                | nd                                | nd                                |
| Violaxanthin      | nd                    | nd                                | nd                                | nd                                |
| Antheraxanthin    | nd                    | nd                                | nd                                | nd                                |
| Lutein            | 1.35 $\pm$ 0.29       | 1.40 $\pm$ 0.16                   | 0.90 $\pm$ 0.10                   | 0.97 $\pm$ 0.04                   |
| Chlorophyll b     | nd                    | nd                                | nd                                | nd                                |
| Chlorophyll a     | 0.66 $\pm$ 0.06       | 1.28 $\pm$ 0.36                   | 0.57 $\pm$ 0.07                   | 1.40 $\pm$ 0.58                   |
| Lycopene          | 12.82 $\pm$ 1.26      | 12.93 $\pm$ 1.37                  | 9.39 $\pm$ 1.74                   | <b>8.32 <math>\pm</math> 0.79</b> |
| $\beta$ -carotene | 8.88 $\pm$ 1.18       | 6.41 $\pm$ 0.11                   | 6.86 $\pm$ 1.26                   | 6.24 $\pm$ 0.63                   |

**Supplemental Table 19.** Pigment content during fruit development in the mitochondrial malate dehydrogenase lines. Values are presented as the mean  $\pm$  SE of 3 biological determinations. The values that are significantly different by *t* test from the wild type are set in bold type ( $P < 0.05$ ). nd means not determined. Red and blue indicate values that are significantly increased or decreased, respectively.

|                   | WT                    | M23                                | M21                               | M14                                |
|-------------------|-----------------------|------------------------------------|-----------------------------------|------------------------------------|
| <b>20 DAF</b>     |                       |                                    |                                   |                                    |
|                   | mg g <sup>-1</sup> FW |                                    |                                   |                                    |
| Neoxanthin        | 1.38 $\pm$ 0.16       | 0.97 $\pm$ 0.13                    | 1.20 $\pm$ 0.02                   | 1.47 $\pm$ 0.24                    |
| Violaxanthin      | 1.63 $\pm$ 0.14       | 1.36 $\pm$ 0.19                    | 1.32 $\pm$ 0.21                   | 1.51 $\pm$ 0.15                    |
| Antheraxanthin    | 1.07 $\pm$ 0.05       | 0.98 $\pm$ 0.04                    | 1.09 $\pm$ 0.05                   | 1.03 $\pm$ 0.05                    |
| Lutein            | 4.85 $\pm$ 0.65       | 3.74 $\pm$ 0.42                    | 4.66 $\pm$ 0.15                   | 6.02 $\pm$ 0.90                    |
| Chlorophyll b     | 15.10 $\pm$ 2.22      | 9.52 $\pm$ 1.26                    | 12.01 $\pm$ 0.31                  | 15.61 $\pm$ 2.53                   |
| Chlorophyll a     | 39.96 $\pm$ 5.40      | 27.21 $\pm$ 3.67                   | 33.21 $\pm$ 0.83                  | 42.63 $\pm$ 5.49                   |
| Lycopene          | nd                    | nd                                 | nd                                | nd                                 |
| $\beta$ -carotene | 6.63 $\pm$ 0.92       | 5.19 $\pm$ 0.70                    | 6.23 $\pm$ 0.16                   | 8.25 $\pm$ 0.96                    |
| <b>35 DAF</b>     |                       |                                    |                                   |                                    |
|                   | mg g <sup>-1</sup> FW |                                    |                                   |                                    |
| Neoxanthin        | 0.66 $\pm$ 0.07       | 0.55 $\pm$ 0.06                    | 0.66 $\pm$ 0.06                   | <b>0.42 <math>\pm</math> 0.01</b>  |
| Violaxanthin      | 0.93 $\pm$ 0.12       | 1.04 $\pm$ 0.15                    | 0.70 $\pm$ 0.03                   | <b>0.52 <math>\pm</math> 0.02</b>  |
| Antheraxanthin    | nd                    | nd                                 | nd                                | nd                                 |
| Lutein            | 2.23 $\pm$ 0.08       | 2.12 $\pm$ 0.12                    | 2.15 $\pm$ 0.24                   | 1.48 $\pm$ 0.06                    |
| Chlorophyll b     | 6.75 $\pm$ 0.09       | <b>5.01 <math>\pm</math> 0.57</b>  | 6.69 $\pm$ 0.93                   | <b>3.97 <math>\pm</math> 0.21</b>  |
| Chlorophyll a     | 17.66 $\pm$ 0.02      | <b>12.95 <math>\pm</math> 1.54</b> | 17.17 $\pm$ 2.34                  | <b>11.06 <math>\pm</math> 0.52</b> |
| Lycopene          | nd                    | nd                                 | nd                                | nd                                 |
| $\beta$ -carotene | 2.83 $\pm$ 0.07       | 3.40 $\pm$ 0.49                    | 2.92 $\pm$ 0.50                   | <b>1.99 <math>\pm</math> 0.12</b>  |
| <b>48 DAF</b>     |                       |                                    |                                   |                                    |
|                   | mg g <sup>-1</sup> FW |                                    |                                   |                                    |
| Neoxanthin        | 0.64 $\pm$ 0.04       | <b>0.42 <math>\pm</math> 0.04</b>  | <b>0.45 <math>\pm</math> 0.01</b> | 0.47 $\pm$ 0.07                    |
| Violaxanthin      | 1.18 $\pm$ 0.06       | <b>0.84 <math>\pm</math> 0.09</b>  | 0.93 $\pm$ 0.07                   | 1.01 $\pm$ 0.20                    |
| Antheraxanthin    | nd                    | nd                                 | nd                                | nd                                 |
| Lutein            | 2.11 $\pm$ 0.02       | <b>1.57 <math>\pm</math> 0.00</b>  | <b>1.75 <math>\pm</math> 0.05</b> | 1.73 $\pm$ 0.31                    |
| Chlorophyll b     | 5.30 $\pm$ 0.41       | 3.43 $\pm$ 0.32                    | 3.20 $\pm$ 0.39                   | 3.19 $\pm$ 0.88                    |
| Chlorophyll a     | 14.64 $\pm$ 0.66      | <b>9.11 <math>\pm</math> 1.05</b>  | <b>8.91 <math>\pm</math> 1.01</b> | 9.07 $\pm$ 2.14                    |
| Lycopene          | nd                    | nd                                 | nd                                | nd                                 |
| $\beta$ -carotene | 2.59 $\pm$ 0.04       | 2.31 $\pm$ 0.32                    | 3.63 $\pm$ 1.08                   | 4.40 $\pm$ 1.49                    |
| <b>56 DAF</b>     |                       |                                    |                                   |                                    |
|                   | mg g <sup>-1</sup> FW |                                    |                                   |                                    |
| Neoxanthin        | nd                    | nd                                 | nd                                | nd                                 |
| Violaxanthin      | 0.25 $\pm$ 0.01       | <b>0.43 <math>\pm</math> 0.01</b>  | <b>0.36 <math>\pm</math> 0.03</b> | nd                                 |
| Antheraxanthin    | nd                    | nd                                 | nd                                | nd                                 |
| Lutein            | 1.13 $\pm$ 0.03       | <b>1.55 <math>\pm</math> 0.14</b>  | 1.33 $\pm$ 0.25                   | 1.01 $\pm$ 0.08                    |
| Chlorophyll b     | nd                    | nd                                 | nd                                | nd                                 |
| Chlorophyll a     | 0.50 $\pm$ 0.06       | <b>1.92 <math>\pm</math> 0.26</b>  | 0.90 $\pm$ 0.44                   | nd                                 |
| Lycopene          | 4.97 $\pm$ 0.91       | 4.20 $\pm$ 0.40                    | 8.62 $\pm$ 3.40                   | <b>10.08 <math>\pm</math> 0.95</b> |
| $\beta$ -carotene | 6.04 $\pm$ 0.40       | 6.66 $\pm$ 0.33                    | 6.83 $\pm$ 0.27                   | 5.98 $\pm$ 0.14                    |
| <b>65 DAF</b>     |                       |                                    |                                   |                                    |
|                   | mg g <sup>-1</sup> FW |                                    |                                   |                                    |
| Neoxanthin        | nd                    | nd                                 | nd                                | nd                                 |
| Violaxanthin      | nd                    | nd                                 | nd                                | nd                                 |
| Antheraxanthin    | nd                    | nd                                 | nd                                | nd                                 |
| Lutein            | 1.32 $\pm$ 0.22       | 1.32 $\pm$ 0.11                    | 1.06 $\pm$ 0.12                   | 1.10 $\pm$ 0.10                    |
| Chlorophyll b     | nd                    | nd                                 | nd                                | nd                                 |
| Chlorophyll a     | 0.56 $\pm$ 0.06       | 0.50 $\pm$ 0.00                    | 0.51 $\pm$ 0.00                   | 0.51 $\pm$ 0.00                    |
| Lycopene          | 5.80 $\pm$ 0.45       | <b>7.62 <math>\pm</math> 0.48</b>  | <b>7.93 <math>\pm</math> 0.36</b> | <b>8.24 <math>\pm</math> 0.42</b>  |
| $\beta$ -carotene | 9.61 $\pm$ 1.32       | 8.66 $\pm$ 0.36                    | 7.09 $\pm$ 0.50                   | 7.17 $\pm$ 0.24                    |
